# Supplementary material
Source: PubMed Central journal article supplement (PMC8043131)
Supplement: ehp7486.s001.acco.pdf [file ehp7486.s001.acco.pdf]

**Note to readers with disabilities:** *EHP* strives to ensure that all journal content is accessible to all readers. However, some figures and Supplemental Material published in *EHP* articles may not conform to [508 standards](#) due to the complexity of the information being presented. If you need assistance accessing journal content, please contact [ehp508@niehs.nih.gov](mailto:ehp508@niehs.nih.gov). Our staff will work with you to assess and meet your accessibility needs within 3 working days.

### **Supplemental Material**

#### **Associations of Pre- and Postnatal Air Pollution Exposures with Child Blood Pressure and Modification by Maternal Nutrition: A Prospective Study in the CANDLE Cohort**

Yu Ni, Adam A. Szpiro, Michael T. Young, Christine T. Loftus, Nicole R. Bush, Kaja Z. LeWinn, Sheela Sathyanarayana, Daniel A. Enquobahrie, Robert L. Davis, Mario Kratz, Annette L. Fitzpatrick, Jennifer T. Sonney, Frances A. Tylavsky, and Catherine J. Karr

#### **Table of Contents**

**Table S1.** Distributions of nutritional measurements by categories in the CANDLE cohort.

**Table S2.** Comparisons of baseline characteristics between the analytic sample and the full CANDLE cohort at enrollment.

**Table S3.** Distributions of blood pressure raw measurements and percentiles in the CANDLE children.

**Table S4.** Spearman correlations of air pollution exposures in different windows in the CANDLE cohort.

**Table S5.** Distributions of air pollution exposures in different windows by maternal HEI levels (Median and above vs. Below Median), maternal plasma folate (1<sup>st</sup> quartile vs. > 1<sup>st</sup> quartile), child sex (female vs. male) and maternal race (Black vs. non-Black) in the CANDLE cohort.

**Table S6.** Estimated effects of air pollution exposures on BP percentiles by maternal HEI levels (Median and above vs. Below Median), maternal plasma folate (1<sup>st</sup> quartile vs. > 1<sup>st</sup> quartile), child sex (female vs. male) and maternal race (Black vs. non-Black) from the interaction models in the CANDLE cohort.

**Table S7.** Estimated effects of air pollution exposures on HBP by maternal HEI levels (Median and above vs. Below Median), maternal plasma folate (1<sup>st</sup> quartile vs. > 1<sup>st</sup> quartile), child sex (female vs. male) and maternal race (Black vs. non-Black) from the interaction models in the CANDLE cohort.

**Table S8.** Comparisons of estimates and 95% CI for PM<sub>2.5</sub> from multi-year spatio-temporal models and fixed-year spatio-temporal models in the CANDLE cohort.

**Table S9.** Comparisons of estimates and 95% CI for NO<sub>2</sub> from annual national models and fixed year national models in the CANDLE cohort.

**Table S10.** Estimated effects of PM<sub>2.5</sub> in the 2<sup>nd</sup> trimester and during the whole prenatal period on BP percentiles from the full model (Model 3) adjusted for time splines of date of conception with varied degree of freedom in the CANDLE cohort.

**Table S11.** Estimated effects of trimester specific PM<sub>2.5</sub> on child BP from the fully adjusted models (Model 3) simultaneously controlled for PM<sub>2.5</sub> in the other two trimesters in the CANDLE cohort.

**Table S12.** Estimated effects of prenatal air pollution exposures on child BP from the fully adjusted models (Model 3) additionally controlled for postnatal exposures in the CANDLE cohort.

**Table S13.** Estimated effects of PM<sub>2.5</sub> in the 2<sup>nd</sup> trimester and during prenatal period on BP percentiles and raw BP from the full model (Model 3) adjusted for thin-plate regression splines (TPRS) of child height and age with varied degree of freedom in the CANDLE cohort.

**Table S14.** Estimated effects of air pollution exposures on BP percentiles and HBP from the fully adjusted model with linear restricted cubic splines of all continuous variables in the CANDLE cohort.

**Table S15.** Estimated effects of air pollution exposures on log transformed DBP percentile from the fully adjusted model in the CANDLE cohort.

**Figure S1.** Directed acyclic graphs for the associations of pre- (A) and postnatal natal air pollution exposures (B) with child blood pressure (Textor et al. 2016).

**Figure S2.** Scatterplots of air pollution exposures in each window by splines of conception date.

**Figure S3.** Distributions of systolic and diastolic blood pressure percentiles and raw measurements in the CANDEL cohort.

**Figure S4.** Boxplots of air pollution exposures in different windows in the CANDEL cohort.

**Figure S5.** Estimated effects of PM<sub>2.5</sub> in the 2<sup>nd</sup> trimester and during prenatal period on BP percentiles from the full model (Model 3) adjusted for time splines of date of conception with varied degree of freedom in the CANDEL cohort.

**Figure S6.** Estimated effects of PM<sub>2.5</sub> in the 2<sup>nd</sup> trimester and during prenatal period on BP percentiles and raw BP from the full model (Model 3) adjusted for thin-plate regression splines (TPRS) of child height and age with varied degree of freedom in the CANDEL cohort.

## Reference

**Table S1: Distributions of nutritional measurements by categories in the CANDLE cohort**

|                           | Healthy Eating Index <sup>a</sup> |       |       |       |       |
|---------------------------|-----------------------------------|-------|-------|-------|-------|
|                           | N                                 | Mean  | Std.  | Min   | Max   |
| Overall                   | 725                               | 59.94 | 11.31 | 26.16 | 88.42 |
| Below median <sup>b</sup> | 363                               | 50.64 | 6.69  | 26.16 | 60.07 |
| Median and above          | 362                               | 69.26 | 6.13  | 60.10 | 88.42 |

  

|                          | Plasma folate (ng/mL) <sup>c</sup> |       |       |       |       |
|--------------------------|------------------------------------|-------|-------|-------|-------|
|                          | N                                  | Mean  | Std.  | Min   | Max   |
| Overall                  | 822                                | 23.00 | 11.10 | 2.56  | 80.48 |
| 1 <sup>st</sup> Quartile | 206                                | 10.44 | 3.23  | 2.56  | 15.01 |
| 2 <sup>nd</sup> Quartile | 205                                | 18.60 | 2.01  | 15.02 | 22.01 |
| 3 <sup>rd</sup> Quartile | 206                                | 25.24 | 2.05  | 22.01 | 28.81 |
| 4 <sup>th</sup> Quartile | 205                                | 37.78 | 8.60  | 28.86 | 80.48 |

- a. The Healthy Eating Index was calculated based on mother's responses to the Block (2005) Food Frequency Questionnaires in the 2<sup>nd</sup> trimester. It comprises 12 nutrient density-adjusted components that sum to a total score ranging from 0 to 100.
- b. The Healthy Eating Index was dichotomized at the median of the CANDLE analytic sample, and below median is defined as poor adherence to the Dietary Guidelines for Americans.
- c. Maternal plasma folate was an average of the measurements in both the 2<sup>nd</sup> and 3<sup>rd</sup> trimester.

**Table S2. Comparisons of baseline characteristics between the analytic sample and the full CANDLE cohort at enrollment**

| Variables                                                               | Analytic sample (N=822) |                                                                                   | CANDLE mothers ever enrolled (N = 1503) |                                                                                   |
|-------------------------------------------------------------------------|-------------------------|-----------------------------------------------------------------------------------|-----------------------------------------|-----------------------------------------------------------------------------------|
|                                                                         | N                       | Mean (SD) /Percentage/<br>Median (25 <sup>th</sup> , 75 <sup>th</sup> percentile) | N                                       | Mean (SD) /Percentage/<br>Median (25 <sup>th</sup> , 75 <sup>th</sup> percentile) |
| <b>Child characteristics</b>                                            |                         |                                                                                   |                                         |                                                                                   |
| Age at age 4-6 visit (year)                                             | 822                     | 4.4 (0.6)                                                                         | 1,157                                   | 4.4 (0.6)                                                                         |
| Height at age 4-6 visit (cm)                                            | 822                     | 106.5 (6.1)                                                                       | 1,069                                   | 106.2 (6.0)                                                                       |
| <b>Sex</b>                                                              |                         |                                                                                   |                                         |                                                                                   |
| Male                                                                    | 410                     | 49.9%                                                                             | 736                                     | 50.3%                                                                             |
| Female                                                                  | 412                     | 50.1%                                                                             | 726                                     | 49.7%                                                                             |
| Missing                                                                 | 0                       | --                                                                                | 41                                      | --                                                                                |
| Birth weight (kg)                                                       | 817                     | 3.2 (0.5)                                                                         | 1,454                                   | 3.2 (0.6)                                                                         |
| Gestational age at childbirth (week)                                    | 818                     | 38.8 (1.8)                                                                        | 1,456                                   | 38.9 (1.9)                                                                        |
| BMI at age 4-6 visit (kg/m <sup>2</sup> )                               | 821                     | 16.5 (2.3)                                                                        | 1,064                                   | 16.5 (2.2)                                                                        |
| <b>BMI class at age 4-6 years visit<sup>a</sup></b>                     |                         |                                                                                   |                                         |                                                                                   |
| Underweight                                                             | 17                      | 2.2%                                                                              | 22                                      | 2.1%                                                                              |
| Normal                                                                  | 524                     | 66.3%                                                                             | 684                                     | 66.6%                                                                             |
| Overweight                                                              | 115                     | 14.6%                                                                             | 150                                     | 14.6%                                                                             |
| Obese                                                                   | 134                     | 17.0%                                                                             | 171                                     | 16.7%                                                                             |
| missing                                                                 | 32                      | --                                                                                | 476                                     | --                                                                                |
| <b>Medication use potentially increasing blood pressure<sup>b</sup></b> |                         |                                                                                   |                                         |                                                                                   |
| No                                                                      | 758                     | 92.2%                                                                             | 1,056                                   | 92.4%                                                                             |
| Yes                                                                     | 64                      | 7.8%                                                                              | 87                                      | 7.6%                                                                              |
| Missing                                                                 | 0                       | --                                                                                | 360                                     | --                                                                                |
| Sleep score at age 4-6 years visit                                      | 816                     | 46.9 (7.2)                                                                        | 1,078                                   | 46.6 (7.2)                                                                        |
| <b>Vigorous activity frequency at age 4-6 years visit<sup>c</sup></b>   |                         |                                                                                   |                                         |                                                                                   |
| Never or occasionally                                                   | 119                     | 14.7%                                                                             | 144                                     | 12.6%                                                                             |
| Once or twice per week                                                  | 87                      | 10.7%                                                                             | 111                                     | 9.7%                                                                              |
| Three or more times per week                                            | 604                     | 74.6%                                                                             | 888                                     | 77.7%                                                                             |
| Missing                                                                 | 12                      | --                                                                                | 360                                     | --                                                                                |
| <b>Second-hand smoking exposure age 4-6 years visit<sup>d</sup></b>     |                         |                                                                                   |                                         |                                                                                   |
| No                                                                      | 540                     | 66.2%                                                                             | 799                                     | 69.6%                                                                             |
| Yes                                                                     | 276                     | 33.8%                                                                             | 349                                     | 30.4%                                                                             |
| missing                                                                 | 6                       | --                                                                                | 355                                     | --                                                                                |
| <b>Maternal characteristics</b>                                         |                         |                                                                                   |                                         |                                                                                   |
| Age at childbirth (year)                                                | 822                     | 26 (5.5)                                                                          | 1,503                                   | 26 (5.4)                                                                          |
| <b>Race</b>                                                             |                         |                                                                                   |                                         |                                                                                   |
| Black                                                                   | 552                     | 67.2%                                                                             | 936                                     | 62.4%                                                                             |
| White                                                                   | 217                     | 26.4%                                                                             | 467                                     | 31.1%                                                                             |
| Asian                                                                   | 8                       | 1.0%                                                                              | 13                                      | 0.9%                                                                              |
| American Indian                                                         | 0                       | 0.0%                                                                              | 1                                       | 0.1%                                                                              |
| Native Hawaiian/Pacific Islander                                        | 0                       | 0.0%                                                                              | 1                                       | 0.1%                                                                              |
| Other                                                                   | 1                       | 0.1%                                                                              | 6                                       | 0.4%                                                                              |
| Multiple race                                                           | 44                      | 5.4%                                                                              | 77                                      | 5.1%                                                                              |
| Missing                                                                 | 0                       | --                                                                                | 2                                       | --                                                                                |
| <b>Education at enrollment</b>                                          |                         |                                                                                   |                                         |                                                                                   |
| < High School                                                           | 113                     | 13.8%                                                                             | 184                                     | 12.3%                                                                             |
| High School/GED                                                         | 398                     | 48.5%                                                                             | 709                                     | 47.2%                                                                             |
| Technical School                                                        | 84                      | 10.2%                                                                             | 138                                     | 9.2%                                                                              |

|                                                              |     |                   |       |                   |
|--------------------------------------------------------------|-----|-------------------|-------|-------------------|
| College Degree                                               | 142 | 17.3%             | 299   | 19.9%             |
| Grad/Professional Degree                                     | 84  | 10.2%             | 171   | 11.4%             |
| missing                                                      | 1   | --                | 2     | --                |
| <b>Marital status at enrollment</b>                          |     |                   |       |                   |
| Married/Living with partner                                  | 430 | 52.4%             | 848   | 56.5%             |
| Widowed/Divorced/Separated                                   | 22  | 2.7%              | 40    | 2.7%              |
| Never Married                                                | 369 | 44.9%             | 614   | 40.9%             |
| missing                                                      | 1   |                   | 1     |                   |
| <b>Insurance status at enrollment</b>                        |     |                   |       |                   |
| No insurance                                                 | 2   | 0.2%              | 2     | 0.1%              |
| Medicaid or Medicare only                                    | 503 | 61.2%             | 859   | 57.2%             |
| Medicaid/Medicare and private insurance                      | 28  | 3.4%              | 42    | 2.8%              |
| Private insurance only                                       | 289 | 35.2%             | 600   | 39.9%             |
| <b>Household income at enrollment</b>                        |     |                   |       |                   |
| \$0-\$19,999                                                 | 303 | 40.5%             | 493   | 36.0%             |
| \$20,000-\$44,999                                            | 197 | 26.3%             | 370   | 27.0%             |
| \$45,000-\$74,999                                            | 138 | 18.4%             | 271   | 19.8%             |
| \$75,000 or over                                             | 110 | 14.7%             | 234   | 17.1%             |
| missing                                                      | 74  | --                | 135   | --                |
| <b>Income adjusted by household size (thousand)</b>          | 817 | 10.9 (3.6, 23.8)  | 1356  | 13.0 (4.7, 28.6)  |
| <b>Urinary cotinine adjusted by specific gravity (ng/mL)</b> | 816 | 0.5 (0.1, 4.8)    | 1162  | 0.4 (0.1, 3.7)    |
| <b>Pre-pregnancy BMI class<sup>e</sup></b>                   |     |                   |       |                   |
| Underweight                                                  | 38  | 4.6%              | 66    | 4.4%              |
| Normal                                                       | 329 | 40.2%             | 633   | 42.3%             |
| Overweight                                                   | 180 | 22.0%             | 354   | 23.6%             |
| Obese                                                        | 272 | 33.2%             | 445   | 29.7%             |
| missing                                                      | 3   | --                | 5     | --                |
| <b>Breastfeeding</b>                                         |     |                   |       |                   |
| No                                                           | 312 | 38.4%             | 401   | 35.1%             |
| Yes (6 months or less)                                       | 295 | 36.3%             | 434   | 37.9%             |
| Yes (Above 6 months)                                         | 205 | 25.2%             | 309   | 27.0%             |
| Missing                                                      | 10  | --                | 359   | --                |
| <b>Pregnancy hypertensive disorder</b>                       |     |                   |       |                   |
| No                                                           | 773 | 94.0%             | 1,408 | 93.7%             |
| Yes                                                          | 49  | 6.0%              | 95    | 6.3%              |
| <b>Pregnancy BSI Global Severity Index<sup>f</sup></b>       | 798 | 46.8 (10.9)       | 1,055 | 46.6 (10.6)       |
| <b>Prenatal plasma folate (ng/mL)</b>                        | 822 | 23 (11.1)         | 1,502 | 23.5 (11)         |
| <b>Healthy eating index in the 2<sup>nd</sup> trimester</b>  | 725 | 60.1 (52.2, 68.4) | 1,322 | 60.5 (52.1, 68.5) |
| <b>Other characteristics</b>                                 |     |                   |       |                   |
| <b>Childhood Opportunity Index<sup>g</sup></b>               |     |                   |       |                   |
| Prenatal Educational index                                   | 818 | -0.03 (0.5)       | 1,415 | 0.02 (0.5)        |
| Prenatal Economics index                                     | 818 | -0.1 (0.6)        | 1,415 | -0.04 (0.6)       |
| Postnatal Educational index                                  | 812 | -0.03 (0.5)       | 1,080 | 0.01 (0.5)        |
| Postnatal Economics index                                    | 812 | -0.1 (0.6)        | 1,080 | -0.04 (0.6)       |
| <b>Recruitment site</b>                                      |     |                   |       |                   |
| General community                                            | 628 | 76.4%             | 1160  | 77.2%             |
| Medical Group clinics                                        | 194 | 23.6%             | 343   | 22.8%             |

- a. Child obesity was defined as a BMI at or above the 95<sup>th</sup> percentile for children of the same age and sex; overweight was defined as a BMI from the 85<sup>th</sup> to less than the 95<sup>th</sup> percentile; normal weight was defined as a BMI from the 5<sup>th</sup> to less than the 85<sup>th</sup> percentile; and underweight was defined as a BMI less than the 5<sup>th</sup> percentile.

- b. Child current medication use was reported by the parents at age 4-6 years visit, and those who were taking medications that may increase blood pressure, such as albuterol, methylphenidate and prednisone were defined as positive.
- c. Child vigorous activity frequency was reported by parents at age 4-6 years visit.
- d. Child second-hand smoking was reported by parents at age 4-6 years visit, and those with any family members who smoked at home was defined as positive.
- e. Maternal pre-pregnancy obesity was defined as a BMI 30.0 kg/m<sup>2</sup> or higher; overweight was defined as a BMI 25.0 kg/m<sup>2</sup> to less than 30.0 kg/m<sup>2</sup>; normal weight was defined as a BMI 18.5 kg/m<sup>2</sup> to less than 25.0 kg/m<sup>2</sup>; and underweight was defined as a BMI less than 18.5 kg/m<sup>2</sup>.
- f. Pregnancy maternal psychological distress was measured by the Global Severity Index from the Brief Symptom Inventory via self-report.
- g. Childhood Opportunity Indices was calculated based on the overall address history in pre- and postnatal window.

Abbreviations: BMI: Body Mass Index; GED: Graduate Equivalency

**Table S3. Distributions of blood pressure raw measurements and percentiles in the CANDLE children.**

| <b>Blood pressure</b> | <b>Observations</b> | <b>Mean (SD)</b> | <b>Minimum</b> | <b>10<sup>th</sup> percentile</b> | <b>25<sup>th</sup> percentile</b> | <b>50<sup>th</sup> percentile</b> | <b>75<sup>th</sup> percentile</b> | <b>90<sup>th</sup> percentile</b> | <b>Maximum</b> |
|-----------------------|---------------------|------------------|----------------|-----------------------------------|-----------------------------------|-----------------------------------|-----------------------------------|-----------------------------------|----------------|
| Raw SBP               | 822                 | 92.3 (10.0)      | 62             | 82                                | 87                                | 92                                | 98                                | 102                               | 168            |
| Raw DBP               | 822                 | 61.1 (9.2)       | 39             | 52                                | 55                                | 61                                | 65                                | 70                                | 142            |
| SBP percentile        | 822                 | 48.6 (25.7)      | 1              | 13                                | 28                                | 48                                | 70                                | 83                                | 99             |
| DBP percentile        | 822                 | 75.6 (19.3)      | 7              | 48                                | 62                                | 82                                | 91                                | 97                                | 99             |

Abbreviations: DBP: diastolic blood pressure; SBP: systolic blood pressure



**Table S4. Spearman correlations of air pollution exposures in different windows in the CANDLE cohort**

|                                             | 1 <sup>st</sup> trimester PM <sub>2.5</sub> | 2 <sup>nd</sup> trimester PM <sub>2.5</sub> | 3 <sup>rd</sup> trimester PM <sub>2.5</sub> | Prenatal PM <sub>2.5</sub> | Postnatal PM <sub>2.5</sub> | Prenatal NO <sub>2</sub> | Postnatal NO <sub>2</sub> |
|---------------------------------------------|---------------------------------------------|---------------------------------------------|---------------------------------------------|----------------------------|-----------------------------|--------------------------|---------------------------|
| 1 <sup>st</sup> trimester PM <sub>2.5</sub> | 1                                           |                                             |                                             |                            |                             |                          |                           |
| 2 <sup>nd</sup> trimester PM <sub>2.5</sub> | 0.1514                                      | 1                                           |                                             |                            |                             |                          |                           |
| 3 <sup>rd</sup> trimester PM <sub>2.5</sub> | -0.0978                                     | 0.0625                                      | 1                                           |                            |                             |                          |                           |
| Prenatal PM <sub>2.5</sub>                  | 0.5481                                      | 0.6353                                      | 0.4719                                      | 1                          |                             |                          |                           |
| Postnatal PM <sub>2.5</sub>                 | 0.0966                                      | 0.0229                                      | 0.1907                                      | 0.3414                     | 1                           |                          |                           |
| Prenatal NO <sub>2</sub>                    | 0.313                                       | 0.2396                                      | 0.3027                                      | 0.5104                     | 0.5649                      | 1                        |                           |
| Postnatal NO <sub>2</sub>                   | 0.1908                                      | 0.1222                                      | 0.2142                                      | 0.3554                     | 0.6709                      | 0.8229                   | 1                         |

**Table S5. Distributions of air pollution exposures in different windows by maternal HEI levels (Median and above vs. Below Median), maternal plasma folate (1<sup>st</sup> quartile vs. > 1<sup>st</sup> quartile), child sex (female vs. male) and maternal race (Black vs. non-Black) in the CANDLE cohort**

| Measurements                                                     | Maternal HEI <median (N=363) |             | Maternal HEI ≥Median (N=362) |             | Plasma folate 1 <sup>st</sup> quartile (N=206) |             | Plasma folate 2 <sup>nd</sup> -4 <sup>th</sup> quartile (N=616) |             |
|------------------------------------------------------------------|------------------------------|-------------|------------------------------|-------------|------------------------------------------------|-------------|-----------------------------------------------------------------|-------------|
|                                                                  | n                            | Mean (SD)/% | n                            | Mean (SD)/% | n                                              | Mean (SD)/% | n                                                               | Mean (SD)/% |
| <b>Prenatal exposures</b>                                        |                              |             |                              |             |                                                |             |                                                                 |             |
| 1 <sup>st</sup> trimester PM <sub>2.5</sub> (µg/m <sup>3</sup> ) | 361                          | 10.8 (1.5)  | 362                          | 10.4 (1.2)  | 205                                            | 10.8 (1.4)  | 613                                                             | 10.7 (1.5)  |
| 2 <sup>nd</sup> trimester PM <sub>2.5</sub> (µg/m <sup>3</sup> ) | 361                          | 10.8 (1.4)  | 362                          | 10.5 (1.2)  | 205                                            | 10.8 (1.5)  | 613                                                             | 10.7 (1.3)  |
| 3 <sup>rd</sup> trimester PM <sub>2.5</sub> (µg/m <sup>3</sup> ) | 360                          | 11.2 (1.9)  | 360                          | 10.7 (1.5)  | 204                                            | 11.4 (1.9)  | 611                                                             | 10.9 (1.6)  |
| Prenatal PM <sub>2.5</sub> (µg/m <sup>3</sup> )                  | 361                          | 10.9 (1.0)  | 362                          | 10.6 (0.8)  | 205                                            | 11.0 (1.0)  | 613                                                             | 10.7 (0.9)  |
| Prenatal NO <sub>2</sub> (ppb)                                   | 361                          | 10.3 (2.5)  | 362                          | 9.4 (2.2)   | 205                                            | 10.9 (2.3)  | 613                                                             | 9.7 (2.4)   |
| Distance to A1 roadway (m)                                       | 361                          | 2321 (1699) | 362                          | 2664 (1972) | 205                                            | 2180 (1646) | 613                                                             | 2593 (1891) |
| Distance to A2 roadway (m)                                       | 361                          | 1838 (1632) | 362                          | 2042 (1655) | 205                                            | 1942 (1605) | 613                                                             | 1912 (1640) |
| Distance to A3 roadway (m)                                       | 361                          | 445 (614)   | 362                          | 465 (501)   | 205                                            | 390 (361)   | 613                                                             | 469 (590)   |
| Proximity to major roadway                                       |                              |             |                              |             |                                                |             |                                                                 |             |
| <150 m                                                           | 113                          | 31.1%       | 90                           | 24.9%       | 62                                             | 30.1%       | 168                                                             | 27.3%       |
| ≥150 m                                                           | 248                          | 68.3%       | 272                          | 75.1%       | 143                                            | 69.4%       | 445                                                             | 72.2%       |
| Missing                                                          | 2                            | 0.6%        | 0                            | 0.0%        | 1                                              | 0.5%        | 3                                                               | 0.5%        |
| <b>Postnatal exposures<sup>a</sup></b>                           |                              |             |                              |             |                                                |             |                                                                 |             |
| Postnatal PM <sub>2.5</sub> (µg/m <sup>3</sup> )                 | 344                          | 10 (0.6)    | 343                          | 9.7 (0.5)   | 195                                            | 10.1 (0.6)  | 585                                                             | 9.8 (0.5)   |
| Postnatal NO <sub>2</sub> (ppb)                                  | 344                          | 9.1 (1.8)   | 343                          | 8.4 (1.8)   | 195                                            | 9.6 (1.7)   | 585                                                             | 8.6 (1.8)   |
| Distance to A1 roadway (m)                                       | 344                          | 2432 (1976) | 343                          | 2667 (2074) | 195                                            | 2365 (1976) | 585                                                             | 2584 (2024) |
| Distance to A2 roadway (m)                                       | 344                          | 1822 (1546) | 343                          | 2103 (1710) | 195                                            | 1967 (1547) | 585                                                             | 1920 (1630) |
| Distance to A3 roadway (m)                                       | 344                          | 426 (450)   | 343                          | 459 (477)   | 195                                            | 382 (310)   | 585                                                             | 459 (490)   |
| Proximity to major roadway                                       |                              |             |                              |             |                                                |             |                                                                 |             |
| <150 m                                                           | 100                          | 29.1%       | 86                           | 25.1%       | 58                                             | 29.7%       | 154                                                             | 26.3%       |
| ≥150 m                                                           | 244                          | 70.9%       | 257                          | 74.9%       | 137                                            | 70.3%       | 431                                                             | 73.7%       |
| Measurements                                                     | Male children (N=410)        |             | Female children (N=412)      |             | Non-black mothers (N=270)                      |             | Black mothers (N=552)                                           |             |
|                                                                  | n                            | Mean (SD)/% | n                            | Mean (SD)/% | n                                              | Mean (SD)/% | n                                                               | Mean (SD)/% |
| <b>Prenatal exposures</b>                                        |                              |             |                              |             |                                                |             |                                                                 |             |
| 1 <sup>st</sup> trimester PM <sub>2.5</sub> (µg/m <sup>3</sup> ) | 409                          | 10.7 (1.5)  | 409                          | 10.7 (1.4)  | 269                                            | 10.4 (1.4)  | 549                                                             | 10.8 (1.5)  |
| 2 <sup>nd</sup> trimester PM <sub>2.5</sub> (µg/m <sup>3</sup> ) | 409                          | 10.71 (1.4) | 409                          | 10.7 (1.4)  | 269                                            | 10.6 (1.4)  | 549                                                             | 10.8 (1.4)  |
| 3 <sup>rd</sup> trimester PM <sub>2.5</sub> (µg/m <sup>3</sup> ) | 407                          | 11.0 (1.7)  | 408                          | 11.0 (1.7)  | 269                                            | 10.8 (1.6)  | 546                                                             | 11.1 (1.7)  |
| Prenatal PM <sub>2.5</sub> (µg/m <sup>3</sup> )                  | 409                          | 10.8 (0.9)  | 409                          | 10.8 (0.9)  | 269                                            | 10.6 (0.9)  | 549                                                             | 10.9 (0.9)  |
| Prenatal NO <sub>2</sub> (ppb)                                   | 409                          | 10.1 (2.4)  | 409                          | 10.0 (2.4)  | 269                                            | 9.1 (2.4)   | 549                                                             | 10.5 (2.3)  |
| Distance to A1 roadway (m)                                       | 409                          | 2463 (1768) | 409                          | 2516 (1912) | 269                                            | 2771 (1999) | 549                                                             | 2352 (1743) |
| Distance to A2 roadway (m)                                       | 409                          | 1982 (1683) | 409                          | 1857 (1577) | 269                                            | 1909 (1664) | 549                                                             | 1925 (1612) |

|                                                  |     |             |     |             |     |             |     |             |
|--------------------------------------------------|-----|-------------|-----|-------------|-----|-------------|-----|-------------|
| Distance to A3 roadway (m)                       | 409 | 434 (526)   | 409 | 464 (559)   | 269 | 611 (784)   | 549 | 370 (345)   |
| Proximity to major roadway                       |     |             |     |             |     |             |     |             |
| <150 m                                           | 121 | 29.5%       | 109 | 26.5%       | 63  | 23.3%       | 167 | 30.3%       |
| ≥150 m                                           | 288 | 70.2%       | 300 | 72.8%       | 206 | 76.3%       | 382 | 69.2%       |
| Missing                                          | 1   | 0.2%        | 3   | 0.7%        | 1   | 0.4%        | 3   | 0.5%        |
| <b>Postnatal exposures<sup>a</sup></b>           |     |             |     |             |     |             |     |             |
| Postnatal PM <sub>2.5</sub> (µg/m <sup>3</sup> ) | 386 | 9.9 (0.6)   | 394 | 9.9 (0.5)   | 250 | 9.7 (0.5)   | 530 | 10 (0.5)    |
| Postnatal NO <sub>2</sub> (ppb)                  | 386 | 8.9 (1.8)   | 394 | 8.9 (1.9)   | 250 | 8.1 (1.9)   | 530 | 9.3 (1.7)   |
| Distance to A1 roadway (m)                       | 386 | 2467 (2065) | 394 | 2589 (1962) | 250 | 2798 (2232) | 530 | 2402 (1890) |
| Distance to A2 roadway (m)                       | 386 | 1937 (1602) | 394 | 1926 (1617) | 250 | 1802 (1525) | 530 | 1993 (1644) |
| Distance to A3 roadway (m)                       | 386 | 434 (459)   | 394 | 446 (447)   | 250 | 575 (585)   | 530 | 376 (357)   |
| Proximity to major roadway                       |     |             |     |             |     |             |     |             |
| <150 m                                           | 104 | 26.9%       | 108 | 27.4%       | 50  | 20.0%       | 162 | 30.6%       |
| ≥150 m                                           | 282 | 73.1%       | 286 | 72.6%       | 200 | 80.0%       | 368 | 69.4%       |

a. There were 42 families who moved out of Shelby County between childbirth and the age 4-6 years visit were excluded from the analysis with postnatal exposures.

**Table S6. Estimated effects of air pollution exposures on BP percentiles by maternal HEI levels (Median and above vs. Below Median), maternal plasma folate (1<sup>st</sup> quartile vs. > 1<sup>st</sup> quartile), child sex (female vs. male) and maternal race (Black vs. non-Black) from the interaction models in the CANDLE cohort**

| Measurements <sup>a</sup>                     | N <sup>b</sup> | SBP percentile                    |                              |  |                                        |                              | DBP percentile |                                   |                |                              |                                        |                |                              |  |                      |
|-----------------------------------------------|----------------|-----------------------------------|------------------------------|--|----------------------------------------|------------------------------|----------------|-----------------------------------|----------------|------------------------------|----------------------------------------|----------------|------------------------------|--|----------------------|
|                                               |                | Maternal HEI < Median             |                              |  | Maternal HEI > Median                  |                              |                | Maternal HEI < Median             |                |                              | Maternal HEI > Median                  |                |                              |  |                      |
|                                               |                | N <sup>c</sup>                    | $\beta$ (95%CI) <sup>d</sup> |  | N <sup>c</sup>                         | $\beta$ (95%CI) <sup>d</sup> |                | P value <sup>e</sup>              | N <sup>c</sup> | $\beta$ (95%CI) <sup>d</sup> |                                        | N <sup>c</sup> | $\beta$ (95%CI) <sup>d</sup> |  | P value <sup>e</sup> |
| <b>Prenatal exposures</b>                     |                |                                   |                              |  |                                        |                              |                |                                   |                |                              |                                        |                |                              |  |                      |
| 1 <sup>st</sup> trimester PM <sub>2.5</sub>   | 669            | 323                               | 3.4 (-6.96, 13.76)           |  | 346                                    | 3.11 (-7.04, 13.26)          |                | 0.93                              | 323            | 2.81 (-4.49, 10.12)          |                                        | 346            | 5.81 (-1.93, 13.55)          |  | 0.19                 |
| 2 <sup>nd</sup> trimester PM <sub>2.5</sub>   | 669            | 323                               | 14.9 (4.05, 25.75)           |  | 346                                    | 15.58 (3.96, 27.19)          |                | 0.83                              | 323            | 8.92 (0.89, 16.94)           |                                        | 346            | 7.8 (-0.88, 16.48)           |  | 0.66                 |
| 3 <sup>rd</sup> trimester PM <sub>2.5</sub>   | 666            | 322                               | -0.64 (-8.75, 7.47)          |  | 324                                    | -0.72 (-9.75, 8.3)           |                | 0.98                              | 322            | 5.17 (-1.12, 11.47)          |                                        | 324            | 7.24 (0.39, 14.09)           |  | 0.30                 |
| Prenatal PM <sub>2.5</sub>                    | 669            | 323                               | 8.13 (-4.29, 20.55)          |  | 346                                    | 6.34 (-6.98, 19.65)          |                | 0.74                              | 323            | 11.13 (1.49, 20.78)          |                                        | 346            | 13.18 (2.59, 23.77)          |  | 0.59                 |
| Prenatal NO <sub>2</sub>                      | 669            | 323                               | 1.11 (-1.61, 3.83)           |  | 346                                    | 3.1 (0.43, 5.77)             |                | 0.25                              | 323            | 0.17 (-1.84, 2.19)           |                                        | 346            | 1.09 (-1.01, 3.19)           |  | 0.49                 |
| Proximity to major roadway <150m <sup>f</sup> | 670            | 323                               | 2.47 (-3.52, 8.46)           |  | 347                                    | 1.74 (-4.28, 7.76)           |                | 0.86                              | 323            | 0.35 (-4.19, 4.89)           |                                        | 347            | 0.57 (-4.16, 5.31)           |  | 0.95                 |
| <b>Postnatal exposures</b>                    |                |                                   |                              |  |                                        |                              |                |                                   |                |                              |                                        |                |                              |  |                      |
| Postnatal PM <sub>2.5</sub>                   | 632            | 304                               | 8.12 (-12.41, 28.64)         |  | 328                                    | 18.15 (-2.34, 38.65)         |                | 0.22                              | 304            | 6.89 (-8.5, 22.28)           |                                        | 328            | 10.89 (-4.25, 26.02)         |  | 0.55                 |
| Postnatal NO <sub>2</sub>                     | 632            | 304                               | -0.61 (-4.45, 3.24)          |  | 328                                    | 2.83 (-0.7, 6.36)            |                | 0.14                              | 304            | 0.84 (-2, 3.68)              |                                        | 328            | 1.68 (-1.07, 4.43)           |  | 0.64                 |
| Proximity to major roadway <150m <sup>f</sup> | 634            | 306                               | 1.04 (-5.34, 7.41)           |  | 328                                    | 0.14 (-6.31, 6.59)           |                | 0.84                              | 306            | -1.08 (-5.95, 3.78)          |                                        | 328            | 0.37 (-4.68, 5.41)           |  | 0.68                 |
| Measurements <sup>a</sup>                     | N <sup>b</sup> | SBP percentile                    |                              |  |                                        |                              | DBP percentile |                                   |                |                              |                                        |                |                              |  |                      |
|                                               |                | Plasma folate in the 1st quartile |                              |  | Plasma folate in the 2nd-4th quartiles |                              |                | Plasma folate in the 1st quartile |                |                              | Plasma folate in the 2nd-4th quartiles |                |                              |  |                      |
|                                               |                | N <sup>c</sup>                    | $\beta$ (95%CI) <sup>d</sup> |  | N <sup>c</sup>                         | $\beta$ (95%CI) <sup>d</sup> |                | P value <sup>e</sup>              | N <sup>c</sup> | $\beta$ (95%CI) <sup>d</sup> |                                        | N <sup>c</sup> | $\beta$ (95%CI) <sup>d</sup> |  | P value <sup>e</sup> |
| <b>Prenatal exposures</b>                     |                |                                   |                              |  |                                        |                              |                |                                   |                |                              |                                        |                |                              |  |                      |
| 1 <sup>st</sup> trimester PM <sub>2.5</sub>   | 756            | 182                               | 0.46 (-10.39, 11.31)         |  | 574                                    | 2.33 (-7.04, 11.69)          |                | 0.60                              | 182            | 3.54 (-4.43, 11.52)          |                                        | 574            | 3.92 (-2.86, 10.71)          |  | 0.87                 |
| 2 <sup>nd</sup> trimester PM <sub>2.5</sub>   | 756            | 182                               | 18.53 (7.85, 29.2)           |  | 574                                    | 12.89 (2.68, 23.09)          |                | 0.05                              | 182            | 11.38 (3.66, 19.09)          |                                        | 574            | 7.43 (-0.03, 14.89)          |  | 0.07                 |
| 3 <sup>rd</sup> trimester PM <sub>2.5</sub>   | 753            | 181                               | 1.45 (-6.93, 9.84)           |  | 572                                    | -2.44 (-10.11, 5.22)         |                | 0.16                              | 181            | 5.64 (-0.51, 11.79)          |                                        | 572            | 3.84 (-2.01, 9.69)           |  | 0.34                 |
| Prenatal PM <sub>2.5</sub>                    | 756            | 182                               | 13.72 (0.49, 26.96)          |  | 574                                    | 7.12 (-4.7, 18.95)           |                | 0.22                              | 182            | 14.06 (4.14, 23.99)          |                                        | 574            | 10.6 (1.66, 19.54)           |  | 0.33                 |
| Prenatal NO <sub>2</sub>                      | 756            | 182                               | 3.31 (-0.14, 6.76)           |  | 574                                    | 0.59 (-1.71, 2.89)           |                | 0.17                              | 182            | 0.68 (-1.88, 3.23)           |                                        | 574            | 0.39 (-1.32, 2.11)           |  | 0.85                 |
| Proximity to major roadway <150m <sup>f</sup> | 757            | 182                               | -1.91 (-10.13, 6.3)          |  | 575                                    | 1.31 (-3.47, 6.09)           |                | 0.50                              | 182            | -1.42 (-7.25, 4.42)          |                                        | 575            | 0.39 (-3.32, 4.11)           |  | 0.61                 |
| <b>Postnatal exposures</b>                    |                |                                   |                              |  |                                        |                              |                |                                   |                |                              |                                        |                |                              |  |                      |
| Postnatal PM <sub>2.5</sub>                   | 715            | 176                               | 15.24 (-6.64, 37.12)         |  | 539                                    | 7.53 (-11.6, 26.65)          |                | 0.38                              | 176            | 6.41 (-8.47, 21.3)           |                                        | 539            | 11.32 (-2.64, 25.29)         |  | 0.43                 |
| Postnatal NO <sub>2</sub>                     | 715            | 176                               | 3.63 (-1.48, 8.73)           |  | 539                                    | -0.93 (-4.01, 2.15)          |                | 0.11                              | 176            | 1.88 (-1.58, 5.34)           |                                        | 539            | 0.71 (-1.67, 3.08)           |  | 0.55                 |
| Proximity to major roadway <150m <sup>f</sup> | 719            | 177                               | 8.11 (-0.05, 16.26)          |  | 542                                    | -2.7 (-7.69, 2.28)           |                | 0.03                              | 177            | 2.62 (-3.32, 8.57)           |                                        | 542            | -2.7 (-6.68, 1.29)           |  | 0.15                 |
| Measurements <sup>a</sup>                     | N <sup>b</sup> | SBP percentile                    |                              |  |                                        |                              | DBP percentile |                                   |                |                              |                                        |                |                              |  |                      |
|                                               |                | Male children                     |                              |  | Female children                        |                              |                | Male children                     |                |                              | Female children                        |                |                              |  |                      |
|                                               |                | N <sup>c</sup>                    | $\beta$ (95%CI) <sup>d</sup> |  | N <sup>c</sup>                         | $\beta$ (95%CI) <sup>d</sup> |                | P value <sup>e</sup>              | N <sup>c</sup> | $\beta$ (95%CI) <sup>d</sup> |                                        | N <sup>c</sup> | $\beta$ (95%CI) <sup>d</sup> |  | P value <sup>e</sup> |
| <b>Prenatal exposures</b>                     |                |                                   |                              |  |                                        |                              |                |                                   |                |                              |                                        |                |                              |  |                      |
| 1 <sup>st</sup> trimester PM <sub>2.5</sub>   | 756            | 372                               | 3.17 (-6.45, 12.79)          |  | 384                                    | 1.47 (-8.13, 11.07)          |                | 0.50                              | 372            | 5.8 (-1.4, 12.99)            |                                        | 384            | 2.71 (-4.2, 9.63)            |  | 0.12                 |
| 2 <sup>nd</sup> trimester PM <sub>2.5</sub>   | 756            | 372                               | 15.57 (5.2, 25.93)           |  | 384                                    | 13.78 (3.48, 24.08)          |                | 0.52                              | 372            | 6.39 (-1.15, 13.93)          |                                        | 384            | 10.64 (3.03, 18.25)          |  | 0.05                 |
| 3 <sup>rd</sup> trimester PM <sub>2.5</sub>   | 753            | 370                               | -1.94 (-9.89, 6.01)          |  | 383                                    | -1.15 (-9.21, 6.91)          |                | 0.75                              | 370            | 2.55 (-3.49, 8.59)           |                                        | 383            | 6.07 (0, 12.15)              |  | 0.06                 |
| Prenatal PM <sub>2.5</sub>                    | 756            | 372                               | 9.81 (-1.8, 21.41)           |  | 384                                    | 7.8 (-4.69, 20.28)           |                | 0.64                              | 372            | 9.46 (0.41, 18.51)           |                                        | 384            | 13.82 (4.49, 23.15)          |  | 0.18                 |
| Prenatal NO <sub>2</sub>                      | 756            | 372                               | 2.04 (-0.41, 4.48)           |  | 384                                    | 0.58 (-2, 3.16)              |                | 0.34                              | 372            | 0.14 (-1.67, 1.96)           |                                        | 384            | 0.77 (-1.21, 2.75)           |  | 0.60                 |
| Proximity to major roadway <150m <sup>f</sup> | 757            | 373                               | 1.16 (-4.41, 6.74)           |  | 384                                    | -0.28 (-6.24, 5.67)          |                | 0.72                              | 373            | -0.65 (-5.1, 3.8)            |                                        | 384            | 0.48 (-3.89, 4.85)           |  | 0.72                 |
| <b>Postnatal exposures</b>                    |                |                                   |                              |  |                                        |                              |                |                                   |                |                              |                                        |                |                              |  |                      |
| Postnatal PM <sub>2.5</sub>                   | 715            | 350                               | 13.59 (-5.85, 33.02)         |  | 365                                    | 5.17 (-14.67, 25.01)         |                | 0.24                              | 350            | 8.5 (-5.03, 22.04)           |                                        | 365            | 11.5 (-3.23, 26.22)          |  | 0.58                 |
| Postnatal NO <sub>2</sub>                     | 715            | 350                               | 2.27 (-1.22, 5.75)           |  | 365                                    | -1.44 (-4.83, 1.95)          |                | 0.07                              | 350            | 1.76 (-0.78, 4.3)            |                                        | 365            | 0.36 (-2.26, 2.98)           |  | 0.37                 |
| Proximity to major roadway <150m <sup>f</sup> | 719            | 351                               | 1.56 (-4.32, 7.43)           |  | 368                                    | -1.07 (-7.19, 5.04)          |                | 0.54                              | 351            | 0.82 (-3.8, 5.45)            |                                        | 368            | -3.23 (-7.92, 1.46)          |  | 0.22                 |
| Measurements <sup>a</sup>                     | N <sup>b</sup> | SBP percentile                    |                              |  |                                        |                              | DBP percentile |                                   |                |                              |                                        |                |                              |  |                      |
|                                               |                | Non-black mothers                 |                              |  | Black mothers                          |                              |                | Non-black mothers                 |                |                              | Black mothers                          |                |                              |  |                      |
|                                               |                | N <sup>c</sup>                    | $\beta$ (95%CI) <sup>d</sup> |  | N <sup>c</sup>                         | $\beta$ (95%CI) <sup>d</sup> |                | P value <sup>e</sup>              | N <sup>c</sup> | $\beta$ (95%CI) <sup>d</sup> |                                        | N <sup>c</sup> | $\beta$ (95%CI) <sup>d</sup> |  | P value <sup>e</sup> |

**Prenatal exposures**

|                                               |     |     |                      |     |                      |      |     |                     |     |                     |      |
|-----------------------------------------------|-----|-----|----------------------|-----|----------------------|------|-----|---------------------|-----|---------------------|------|
| 1 <sup>st</sup> trimester PM <sub>2.5</sub>   | 756 | 251 | 3.6 (-6.09, 13.29)   | 505 | 1.03 (-8.64, 10.69)  | 0.35 | 251 | 2.69 (-4.39, 9.76)  | 505 | 4.73 (-2.51, 11.98) | 0.40 |
| 2 <sup>nd</sup> trimester PM <sub>2.5</sub>   | 756 | 251 | 12.49 (1.92, 23.05)  | 505 | 16.15 (6, 26.3)      | 0.20 | 251 | 7.68 (-0.26, 15.62) | 505 | 9.35 (2, 16.7)      | 0.47 |
| 3 <sup>rd</sup> trimester PM <sub>2.5</sub>   | 753 | 251 | -2.55 (-10.76, 5.66) | 502 | -1.14 (-9.04, 6.76)  | 0.60 | 251 | 4.68 (-1.58, 10.94) | 502 | 4.12 (-1.8, 10.04)  | 0.78 |
| Prenatal PM <sub>2.5</sub>                    | 756 | 251 | 5.99 (-6.92, 18.9)   | 505 | 10.29 (-1.45, 22.04) | 0.38 | 251 | 8.96 (-1.13, 19.05) | 505 | 12.93 (4.02, 21.84) | 0.29 |
| Prenatal NO <sub>2</sub>                      | 756 | 251 | 1.06 (-2.15, 4.27)   | 505 | 1.39 (-0.9, 3.67)    | 0.86 | 251 | 0.21 (-2.35, 2.77)  | 505 | 0.58 (-1.1, 2.27)   | 0.80 |
| Proximity to major roadway <150m <sup>f</sup> | 757 | 251 | 7.44 (-0.01, 14.88)  | 506 | -2.38 (-7.24, 2.47)  | 0.03 | 251 | 4.54 (-1.24, 10.33) | 506 | -1.96 (-5.68, 1.75) | 0.06 |
| <b>Postnatal exposures</b>                    |     |     |                      |     |                      |      |     |                     |     |                     |      |
| Postnatal PM <sub>2.5</sub>                   | 715 | 235 | 9.27 (-12.71, 31.25) | 480 | 9.66 (-9.51, 28.83)  | 0.96 | 235 | 11.42 (-5.1, 27.95) | 480 | 9.34 (-4.01, 22.69) | 0.75 |
| Postnatal NO <sub>2</sub>                     | 715 | 235 | -2.73 (-7.05, 1.59)  | 480 | 1.72 (-1.46, 4.91)   | 0.07 | 235 | -0.84 (-4.13, 2.45) | 480 | 1.91 (-0.45, 4.26)  | 0.14 |
| Proximity to major roadway <150m <sup>f</sup> | 719 | 236 | -2.72 (-10.92, 5.48) | 483 | 1.21 (-3.79, 6.21)   | 0.42 | 236 | -1.02 (-7.79, 5.74) | 483 | -1.35 (-5.16, 2.47) | 0.94 |

- a. PM<sub>2.5</sub> and NO<sub>2</sub> in each window were rescaled to two-unit increment.
- b. N is the analytic sample size for each interaction model.
- c. N is the analytic sample in each stratum.
- d. In addition to effect modifiers and interaction terms, the linear regressions were controlled for child sex, child age and height at age 4-6 years visit, study site, maternal age at childbirth, maternal race, maternal education, income adjusted by household size, breastfeeding, urinary cotinine adjusted by specific gravity in the 2<sup>nd</sup> trimester, BMI class before pregnancy, insurance status, maternal Global Severity Index, child sleeping scores, child physical activity levels, child second-hand smoking exposures, child use of medication that potentially increased blood pressure and Child Opportunity Indices. Visit date was universally modeled with 1 degree of freedom (df)/year in all models. Conception date was modeled with 1 df/year for analyses with NO<sub>2</sub>, and was modeled with varied df for PM<sub>2.5</sub> in different windows: 8 df/year of conception date for trimester specific PM<sub>2.5</sub>, 4 df/year for prenatal PM<sub>2.5</sub> and 1 df/year for postnatal PM<sub>2.5</sub>. There was no time adjustment for proximity to major roadway in all interaction models.
- e. P values are for interaction terms.
- f. Proximity to major roadway was estimated based on the single address with the longest residential history in the pre- and postnatal window and was dichotomized at 150 meters from any major roadway of A1, A2 or A3.

Abbreviations: SBP: systolic blood pressure, DBP: diastolic blood pressure

**Table S7. Estimated effects of air pollution exposures on HBP by maternal HEI levels (Median and above vs. Below Median), maternal plasma folate (1<sup>st</sup> quartile vs. > 1<sup>st</sup> quartile), child sex (female vs. male) and maternal race (Black vs. non-Black) from the interaction models in the CANDLE cohort**

|                                               | N <sup>b</sup> | Maternal HEI <Median                          |                          | Maternal HEI ≥Median                                           |                          | P value <sup>e</sup> |
|-----------------------------------------------|----------------|-----------------------------------------------|--------------------------|----------------------------------------------------------------|--------------------------|----------------------|
|                                               |                | N of HBP <sup>c</sup>                         | IRR (95%CI) <sup>d</sup> | N of HBP <sup>c</sup>                                          | IRR (95%CI) <sup>d</sup> |                      |
| <b>Prenatal exposures</b>                     |                |                                               |                          |                                                                |                          |                      |
| 1 <sup>st</sup> trimester PM <sub>2.5</sub>   | 669            | 98                                            | 1.01 (0.52, 1.96)        | 86                                                             | 1.17 (0.59, 2.34)        | 0.48                 |
| 2 <sup>nd</sup> trimester PM <sub>2.5</sub>   | 669            | 98                                            | 0.8 (0.38, 1.66)         | 86                                                             | 0.9 (0.43, 1.91)         | 0.51                 |
| 3 <sup>rd</sup> trimester PM <sub>2.5</sub>   | 666            | 98                                            | 1.14 (0.71, 1.86)        | 86                                                             | 1.25 (0.76, 2.04)        | 0.57                 |
| Prenatal PM <sub>2.5</sub>                    | 669            | 98                                            | 1.38 (0.58, 3.33)        | 86                                                             | 1.71 (0.68, 4.31)        | 0.51                 |
| Prenatal NO <sub>2</sub>                      | 669            | 98                                            | 1.01 (0.85, 1.2)         | 86                                                             | 1.08 (0.89, 1.31)        | 0.56                 |
| Proximity to major roadway <150m <sup>f</sup> | 670            | 98                                            | 1.03 (0.73, 1.47)        | 87                                                             | 1.08 (0.72, 1.64)        | 0.87                 |
| <b>Postnatal exposures</b>                    |                |                                               |                          |                                                                |                          |                      |
| Postnatal PM <sub>2.5</sub>                   | 632            | 90                                            | 1.99 (0.57, 6.98)        | 85                                                             | 2.04 (0.54, 7.7)         | 0.97                 |
| Postnatal NO <sub>2</sub>                     | 632            | 90                                            | 1.15 (0.89, 1.47)        | 85                                                             | 1.16 (0.92, 1.48)        | 0.92                 |
| Proximity to major roadway <150m <sup>f</sup> | 634            | 91                                            | 0.86 (0.58, 1.29)        | 85                                                             | 1.23 (0.83, 1.83)        | 0.21                 |
|                                               | N <sup>b</sup> | Plasma folate in the 1 <sup>st</sup> quartile |                          | Plasma folate in the 2 <sup>nd</sup> -4 <sup>th</sup> quartile |                          | P value <sup>e</sup> |
|                                               |                | N of HBP <sup>c</sup>                         | IRR (95%CI) <sup>d</sup> | N of HBP <sup>c</sup>                                          | IRR (95%CI) <sup>d</sup> |                      |
| <b>Prenatal exposures</b>                     |                |                                               |                          |                                                                |                          |                      |
| 1 <sup>st</sup> trimester PM <sub>2.5</sub>   | 756            | 60                                            | 0.71 (0.37, 1.36)        | 159                                                            | 0.93 (0.53, 1.65)        | 0.14                 |
| 2 <sup>nd</sup> trimester PM <sub>2.5</sub>   | 756            | 60                                            | 1.08 (0.57, 2.05)        | 159                                                            | 0.91 (0.48, 1.72)        | 0.22                 |
| 3 <sup>rd</sup> trimester PM <sub>2.5</sub>   | 753            | 60                                            | 1.33 (0.81, 2.17)        | 159                                                            | 1.07 (0.69, 1.66)        | 0.14                 |
| Prenatal PM <sub>2.5</sub>                    | 756            | 60                                            | 1.61 (0.73, 3.52)        | 159                                                            | 1.45 (0.67, 3.15)        | 0.68                 |
| Prenatal NO <sub>2</sub>                      | 756            | 60                                            | 0.99 (0.82, 1.2)         | 159                                                            | 1.05 (0.9, 1.22)         | 0.62                 |
| Proximity to major roadway <150m <sup>f</sup> | 757            | 60                                            | 0.86 (0.54, 1.38)        | 160                                                            | 1.09 (0.82, 1.46)        | 0.40                 |
| <b>Postnatal exposures</b>                    |                |                                               |                          |                                                                |                          |                      |
| Postnatal PM <sub>2.5</sub>                   | 715            | 58                                            | 1.94 (0.6, 6.29)         | 150                                                            | 2.23 (0.68, 7.26)        | 0.80                 |
| Postnatal NO <sub>2</sub>                     | 715            | 58                                            | 1.13 (0.86, 1.47)        | 150                                                            | 1.16 (0.94, 1.42)        | 0.86                 |
| Proximity to major roadway <150m <sup>f</sup> | 719            | 58                                            | 1.1 (0.71, 1.71)         | 152                                                            | 0.9 (0.65, 1.24)         | 0.46                 |
| measurements                                  | N <sup>b</sup> | Male children                                 |                          | Female children                                                |                          | P value <sup>e</sup> |
|                                               |                | N of HBP <sup>c</sup>                         | IRR (95%CI) <sup>d</sup> | N of HBP <sup>c</sup>                                          | IRR (95%CI) <sup>d</sup> |                      |
| <b>Prenatal exposures</b>                     |                |                                               |                          |                                                                |                          |                      |
| 1 <sup>st</sup> trimester PM <sub>2.5</sub>   | 756            | 134                                           | 1 (0.56, 1.78)           | 85                                                             | 0.81 (0.44, 1.48)        | 0.19                 |
| 2 <sup>nd</sup> trimester PM <sub>2.5</sub>   | 756            | 134                                           | 0.97 (0.52, 1.83)        | 85                                                             | 0.97 (0.51, 1.87)        | 1.00                 |
| 3 <sup>rd</sup> trimester PM <sub>2.5</sub>   | 753            | 134                                           | 1.08 (0.7, 1.68)         | 85                                                             | 1.15 (0.72, 1.84)        | 0.68                 |
| Prenatal PM <sub>2.5</sub>                    | 756            | 134                                           | 1.55 (0.73, 3.3)         | 85                                                             | 1.4 (0.62, 3.17)         | 0.67                 |
| Prenatal NO <sub>2</sub>                      | 756            | 134                                           | 1.07 (0.93, 1.23)        | 85                                                             | 0.98 (0.81, 1.19)        | 0.39                 |
| Proximity to major roadway <150m <sup>f</sup> | 757            | 135                                           | 1.06 (0.78, 1.43)        | 85                                                             | 0.97 (0.64, 1.46)        | 0.74                 |
| <b>Postnatal exposures</b>                    |                |                                               |                          |                                                                |                          |                      |
| Postnatal PM <sub>2.5</sub>                   | 715            | 129                                           | 1.85 (0.61, 5.55)        | 79                                                             | 2.68 (0.78, 9.19)        | 0.44                 |
| Postnatal NO <sub>2</sub>                     | 715            | 129                                           | 1.21 (1, 1.47)           | 79                                                             | 1.06 (0.83, 1.35)        | 0.30                 |
| Proximity to major roadway <150m <sup>f</sup> | 719            | 130                                           | 0.93 (0.67, 1.28)        | 80                                                             | 1 (0.66, 1.52)           | 0.77                 |
|                                               | N <sup>b</sup> | Non-black mothers                             |                          | Black mothers                                                  |                          | P value <sup>e</sup> |
|                                               |                | N of HBP <sup>c</sup>                         | IRR (95%CI) <sup>d</sup> | N of HBP <sup>c</sup>                                          | IRR (95%CI) <sup>d</sup> |                      |
| <b>Prenatal exposures</b>                     |                |                                               |                          |                                                                |                          |                      |
| 1 <sup>st</sup> trimester PM <sub>2.5</sub>   | 756            | 63                                            | 1.01 (0.55, 1.87)        | 156                                                            | 0.83 (0.46, 1.49)        | 0.25                 |
| 2 <sup>nd</sup> trimester PM <sub>2.5</sub>   | 756            | 63                                            | 0.94 (0.49, 1.8)         | 156                                                            | 1 (0.52, 1.91)           | 0.68                 |
| 3 <sup>rd</sup> trimester PM <sub>2.5</sub>   | 753            | 63                                            | 1.1 (0.67, 1.8)          | 156                                                            | 1.11 (0.72, 1.72)        | 0.95                 |
| Prenatal PM <sub>2.5</sub>                    | 756            | 63                                            | 1.47 (0.61, 3.54)        | 156                                                            | 1.51 (0.72, 3.17)        | 0.93                 |
| Prenatal NO <sub>2</sub>                      | 756            | 63                                            | 1.03 (0.8, 1.33)         | 156                                                            | 1.03 (0.9, 1.19)         | 0.99                 |
| Proximity to major roadway <150m <sup>f</sup> | 757            | 63                                            | 1.46 (0.91, 2.34)        | 157                                                            | 0.91 (0.69, 1.2)         | 0.09                 |
| <b>Postnatal exposures</b>                    |                |                                               |                          |                                                                |                          |                      |
| Postnatal PM <sub>2.5</sub>                   | 715            | 58                                            | 1.97 (0.44, 8.84)        | 150                                                            | 2.16 (0.74, 6.35)        | 0.88                 |
| Postnatal NO <sub>2</sub>                     | 715            | 58                                            | 0.92 (0.69, 1.23)        | 150                                                            | 1.24 (1.02, 1.51)        | 0.06                 |
| Proximity to major roadway <150m <sup>f</sup> | 719            | 59                                            | 1.09 (0.61, 1.94)        | 151                                                            | 0.92 (0.69, 1.23)        | 0.62                 |

- a.  $PM_{2.5}$  and  $NO_2$  in each window were rescaled to two-unit increment.
- b. N is the analytic sample size for each interaction model.
- c. N is the cases of HBP in each stratum.
- d. In addition to effect modifiers and interaction terms, the Poisson regressions were controlled for child sex, child age and height at age 4-6 years visit, study site, maternal age at childbirth, maternal race, maternal education, income adjusted by household size, breastfeeding, urinary cotinine adjusted by specific gravity in the 2<sup>nd</sup> trimester, BMI class before pregnancy, insurance status, maternal Global Severity Index, child sleeping scores, child physical activity levels, child second-hand smoking exposures, child use of medication that potentially increased blood pressure and Child Opportunity Indices. Visit date was universally modeled with 1 degree of freedom (df)/year in all models. Conception date was modeled with 1 df/year for analyses with  $NO_2$ , and was modeled with varied df for  $PM_{2.5}$  in different windows: 8 df/year of conception date for trimester specific  $PM_{2.5}$ , 4 df/year for prenatal  $PM_{2.5}$  and 1 df/year for postnatal  $PM_{2.5}$ . There was no time adjustment for proximity to major roadway in all interaction models.
- e. P values are for interaction terms.
- f. Proximity to major roadway was estimated based on the single address with the longest residential history in the pre- and postnatal window and was dichotomized at 150 meters from any major roadway of A1, A2 or A3.

Abbreviations: HBP: high blood pressure, IRR: incidence rate ratio

**Table S8. Comparisons of estimates and 95% CI for PM<sub>2.5</sub> from multi-year spatio-temporal models and fixed-year spatio-temporal models in the CANDLE cohort**

| Models <sup>b</sup>   | Prenatal PM <sub>2.5</sub> <sup>a</sup>        |                       |                                        |                       | Postnatal PM <sub>2.5</sub> <sup>a</sup>       |                       |                                        |                       |
|-----------------------|------------------------------------------------|-----------------------|----------------------------------------|-----------------------|------------------------------------------------|-----------------------|----------------------------------------|-----------------------|
|                       | Multi-year spatio-temporal models <sup>c</sup> |                       | 2006 fixed-year spatio-temporal models |                       | Multi-year spatio-temporal models <sup>c</sup> |                       | 2011 fixed-year spatio-temporal models |                       |
|                       | N <sup>d</sup>                                 | $\beta$ /IRR (95% CI) | N <sup>d</sup>                         | $\beta$ /IRR (95% CI) | N <sup>d</sup>                                 | $\beta$ /IRR (95% CI) | N <sup>d</sup>                         | $\beta$ /IRR (95% CI) |
| <b>SBP percentile</b> |                                                |                       |                                        |                       |                                                |                       |                                        |                       |
| Model 1               | 818                                            | -1.96 (-6.75, 2.83)   | 818                                    | 9.3 (-0.16, 18.75)    | 780                                            | 16.99 (7.46, 26.51)   | 780                                    | 12.71 (-0.64, 26.07)  |
| Model 2               | 817                                            | 9.06 (-0.16, 18.28)   | 817                                    | 10.54 (1.04, 20.05)   | 775                                            | 15.08 (1.42, 28.73)   | 775                                    | 13.88 (0.42, 27.33)   |
| Model 3               | 756                                            | 8.83 (-2.45, 20.11)   | 756                                    | 8.96 (-2.63, 20.55)   | 715                                            | 9.55 (-8.85, 27.94)   | 715                                    | 9.05 (-9.26, 27.36)   |
| Model 4               | 754                                            | 8.26 (-3.15, 19.66)   | 754                                    | 8.74 (-2.81, 20.3)    | 714                                            | 8.79 (-9.73, 27.31)   | 714                                    | 8.82 (-9.66, 27.31)   |
| <b>DBP percentile</b> |                                                |                       |                                        |                       |                                                |                       |                                        |                       |
| Model 1               | 818                                            | -0.06 (-3.48, 3.36)   | 818                                    | 8.17 (1.15, 15.18)    | 780                                            | 6.7 (-0.25, 13.65)    | 780                                    | 8.95 (-1.01, 18.92)   |
| Model 2               | 817                                            | 8.81 (1.77, 15.85)    | 817                                    | 9.56 (2.63, 16.49)    | 775                                            | 8.98 (-0.78, 18.74)   | 775                                    | 9.52 (-0.16, 19.19)   |
| Model 3               | 756                                            | 11.58 (2.94, 20.22)   | 756                                    | 11.64 (3.47, 19.81)   | 715                                            | 9.94 (-3.15, 23.02)   | 715                                    | 11.45 (-1.57, 24.47)  |
| Model 4               | 754                                            | 11.03 (2.54, 19.52)   | 754                                    | 11.58 (3.55, 19.61)   | 714                                            | 9.72 (-3.36, 22.81)   | 714                                    | 11.49 (-1.55, 24.53)  |
| <b>HBP</b>            |                                                |                       |                                        |                       |                                                |                       |                                        |                       |
| Model 1               | 818                                            | 0.78 (0.59, 1.03)     | 818                                    | 0.99 (0.55, 1.79)     | 780                                            | 1.74 (0.98, 3.1)      | 780                                    | 1.65 (0.7, 3.89)      |
| Model 2               | 817                                            | 1.26 (0.7, 2.28)      | 817                                    | 1.03 (0.57, 1.86)     | 775                                            | 1.78 (0.76, 4.17)     | 775                                    | 1.82 (0.75, 4.39)     |
| Model 3               | 756                                            | 1.5 (0.71, 3.14)      | 756                                    | 1.09 (0.55, 2.15)     | 715                                            | 2.12 (0.73, 6.15)     | 715                                    | 2.16 (0.72, 6.5)      |
| Model 4               | 754                                            | 1.39 (0.66, 2.94)     | 754                                    | 1.05 (0.53, 2.08)     | 714                                            | 2.1 (0.71, 6.17)      | 714                                    | 2.17 (0.71, 6.63)     |

- PM<sub>2.5</sub> in each window was rescaled to two-unit increment.
- Multivariate linear regressions were used for BP percentiles and Poisson regressions were used for HBP based on complete data. Model 1 was adjusted for child sex, child age and height at age 4-6 years visit, and recruitment site. Model 2 was additionally adjusted for times splines for visit date and conception date. Visit date was universally modeled with 1 degree of freedom (df)/year in all models. Conception date was modeled with varied df for PM<sub>2.5</sub> in different windows: 8 df/year of conception date for trimester specific PM<sub>2.5</sub>, 4 df/year for prenatal PM<sub>2.5</sub> and 1 df/year for postnatal PM<sub>2.5</sub>. Model 3 (the fully adjusted model) was additionally adjusted for maternal race, maternal age at childbirth, maternal education, income adjusted by household size, breastfeeding, maternal Global Severity Index, urinary cotinine adjusted by specific gravity in the 2<sup>nd</sup> trimester, BMI class before pregnancy, insurance status, child sleep scores, child physical activity levels, child second-hand smoking exposures, child use of medication that potentially increased blood pressure and Child Opportunity Indices. Model 4 (the extended model) was further controlled for maternal hypertensive disorder, gestational age, birthweight and child BMI at



the age 4-6 years visit for prenatal exposures, and was only additionally for child BMI at the age 4-6 years visit for postnatal exposures.

- c. The spatio-temporal models correspond to the models used in the primary analysis, and the results are the same as those shown in Table 3.
- d. N is the analytic sample size for each model.

Abbreviations: DBP: diastolic blood pressure, SBP: systolic blood pressure, HBP: high blood pressure, IRR: incidence rate ratio

**Table S9. Comparisons of estimates and 95% CI for NO<sub>2</sub> from annual national models and fixed year national models in the CANDLE cohort**

| Models <sup>b</sup>   | Prenatal NO <sub>2</sub> <sup>a</sup> |                    |                      |                    | Postnatal NO <sub>2</sub> <sup>a</sup> |                    |                      |                    |
|-----------------------|---------------------------------------|--------------------|----------------------|--------------------|----------------------------------------|--------------------|----------------------|--------------------|
|                       | Annual national models <sup>c</sup>   |                    | 2006 national models |                    | Annual national models <sup>c</sup>    |                    | 2011 national models |                    |
|                       | N <sup>d</sup>                        | β/IRR (95% CI)     | N <sup>d</sup>       | β/IRR (95% CI)     | N <sup>d</sup>                         | β/IRR (95% CI)     | N <sup>d</sup>       | β/IRR (95% CI)     |
| <b>SBP percentile</b> |                                       |                    |                      |                    |                                        |                    |                      |                    |
| Model 1               | 818                                   | 0.79 (-0.92, 2.49) | 818                  | 0.85 (-0.64, 2.34) | 780                                    | 1.55 (-0.66, 3.77) | 780                  | 0.82 (-1.26, 2.9)  |
| Model 2               | 817                                   | 1.13 (-0.56, 2.82) | 817                  | 0.95 (-0.53, 2.43) | 775                                    | 1.09 (-1.15, 3.32) | 775                  | 1.01 (-1.08, 3.1)  |
| Model 3               | 756                                   | 1.28 (-0.74, 3.31) | 756                  | 1.07 (-0.7, 2.85)  | 715                                    | 0.25 (-2.53, 3.04) | 715                  | 0.2 (-2.4, 2.8)    |
| Model 4               | 754                                   | 1 (-1.01, 3.02)    | 754                  | 0.86 (-0.92, 2.63) | 714                                    | 0.14 (-2.59, 2.88) | 714                  | 0.06 (-2.49, 2.62) |
| <b>DBP percentile</b> |                                       |                    |                      |                    |                                        |                    |                      |                    |
| Model 1               | 818                                   | -0.1 (-1.39, 1.19) | 818                  | 0.12 (-1.01, 1.25) | 780                                    | 1.13 (-0.52, 2.77) | 780                  | 0.86 (-0.7, 2.42)  |
| Model 2               | 817                                   | 0.29 (-0.99, 1.57) | 817                  | 0.18 (-0.94, 1.29) | 775                                    | 0.86 (-0.79, 2.52) | 775                  | 0.83 (-0.73, 2.39) |
| Model 3               | 756                                   | 0.47 (-1.03, 1.97) | 756                  | 0.31 (-0.99, 1.62) | 715                                    | 1 (-1.08, 3.07)    | 715                  | 0.99 (-0.96, 2.94) |
| Model 4               | 754                                   | 0.36 (-1.1, 1.81)  | 754                  | 0.24 (-1.04, 1.52) | 714                                    | 0.94 (-1.11, 2.99) | 714                  | 0.91 (-1.01, 2.84) |
| <b>HBP</b>            |                                       |                    |                      |                    |                                        |                    |                      |                    |
| Model 1               | 818                                   | 0.97 (0.87, 1.08)  | 818                  | 0.99 (0.9, 1.09)   | 780                                    | 1.13 (0.98, 1.3)   | 780                  | 1.1 (0.96, 1.25)   |
| Model 2               | 817                                   | 1 (0.9, 1.12)      | 817                  | 1 (0.91, 1.1)      | 775                                    | 1.11 (0.96, 1.28)  | 775                  | 1.11 (0.97, 1.27)  |
| Model 3               | 756                                   | 1.03 (0.91, 1.18)  | 756                  | 1.03 (0.92, 1.15)  | 715                                    | 1.15 (0.96, 1.37)  | 715                  | 1.15 (0.97, 1.36)  |
| Model 4               | 754                                   | 1.03 (0.9, 1.17)   | 754                  | 1.02 (0.91, 1.14)  | 714                                    | 1.14 (0.95, 1.36)  | 714                  | 1.14 (0.96, 1.35)  |

- NO<sub>2</sub> in each window was rescaled to two-unit increment.
- Multivariate linear regressions were used for BP percentiles and Poisson regressions were used for HBP based on complete data. Model 1 was adjusted for child sex, child age and height at age 4-6 years visit, and recruitment site. Model 2 was additionally adjusted for times splines for visit date and conception date. Visit date and conception date were modeled with 1 degree of freedom (df)/year in all models. Model 3 (the fully adjusted model) was additionally adjusted for maternal race, maternal age at childbirth, maternal education, income adjusted by household size, breastfeeding, maternal Global Severity Index, urinary cotinine adjusted by specific gravity in the 2<sup>nd</sup> trimester, BMI class before pregnancy, insurance status, child sleep scores, child physical activity levels, child second-hand smoking exposures, child use of medication that potentially increased blood pressure and Child Opportunity Indices. Model 4 (the extended model) was further controlled for maternal hypertensive disorder, gestational age, birthweight and child BMI at the age 4-6 years visit for prenatal exposures, and was only additionally for child BMI at the age 4-6 years visit for postnatal exposures.
- The national annual models correspond to the models used in the primary analysis, and the results are the same as those shown in Table 3.

d. N is the analytic sample size for each model.

Abbreviations: DBP: diastolic blood pressure, SBP: systolic blood pressure, HBP: high blood pressure, IRR: incidence rate ratio

**Table S10. Estimated effects of PM<sub>2.5</sub> in the 2<sup>nd</sup> trimester and during the whole prenatal period on BP percentiles from the full model (Model 3) adjusted for time splines of date of conception with varied degree of freedom in the CANDLE cohort**

| Degree of freedom for conception date <sup>c</sup> | PM <sub>2.5</sub> in the 2 <sup>nd</sup> trimester <sup>a</sup> (N <sup>b</sup> = 756) |                                                      | Prenatal PM <sub>2.5</sub> <sup>a</sup> (N <sup>b</sup> = 756) |                                                      |
|----------------------------------------------------|----------------------------------------------------------------------------------------|------------------------------------------------------|----------------------------------------------------------------|------------------------------------------------------|
|                                                    | SBP percentile<br>$\beta$ /IRR (95% CI) <sup>d</sup>                                   | DBP percentile<br>$\beta$ /IRR (95% CI) <sup>d</sup> | SBP percentile<br>$\beta$ /IRR (95% CI) <sup>d</sup>           | DBP percentile<br>$\beta$ /IRR (95% CI) <sup>d</sup> |
| No adjustment                                      | 1.03 (-1.63, 3.69)                                                                     | 0.75 (-1.32, 2.82)                                   | 1.04 (-4.3, 6.37)                                              | 2.37 (-1.85, 6.59)                                   |
| 1                                                  | 2.02 (-0.9, 4.94)                                                                      | 1.59 (-0.6, 3.78)                                    | 3.29 (-3.2, 9.78)                                              | 6 (1.05, 10.95)                                      |
| 2                                                  | 3.48 (-0.18, 7.13)                                                                     | 1.98 (-0.61, 4.57)                                   | 6.4 (-1.66, 14.46)                                             | 7.88 (2.01, 13.75)                                   |
| 3                                                  | 6.26 (0.94, 11.59)                                                                     | 2.78 (-1, 6.56)                                      | 10.45 (-0.83, 21.73)                                           | 11.88 (3.28, 20.48)                                  |
| 4                                                  | 8.46 (1.99, 14.94)                                                                     | 5.46 (0.99, 9.92)                                    | 8.83 (-2.45, 20.11)                                            | 11.58 (2.94, 20.22)                                  |
| 5                                                  | 13.76 (4.97, 22.54)                                                                    | 7.9 (1.35, 14.45)                                    | 12.68 (0.49, 24.87)                                            | 15.75 (6.46, 25.04)                                  |
| 6                                                  | 14.9 (5.39, 24.4)                                                                      | 9.09 (2.13, 16.04)                                   | 13.05 (0.62, 25.48)                                            | 15.51 (6.05, 24.96)                                  |
| 7                                                  | 14.88 (5.06, 24.71)                                                                    | 9.21 (1.99, 16.44)                                   | 13.25 (0.83, 25.67)                                            | 15.64 (6.3, 24.97)                                   |
| 8                                                  | 14.61 (4.62, 24.6)                                                                     | 8.65 (1.38, 15.92)                                   | 12.78 (0.25, 25.31)                                            | 14.7 (5.2, 24.2)                                     |
| 9                                                  | 15.05 (5.07, 25.02)                                                                    | 8.46 (1.05, 15.86)                                   | 14.03 (1.4, 26.67)                                             | 15.26 (5.66, 24.86)                                  |
| 10                                                 | 14.41 (4.29, 24.53)                                                                    | 7.69 (0.09, 15.3)                                    | 13.74 (0.92, 26.56)                                            | 14.99 (5.22, 24.76)                                  |
| 11                                                 | 15.21 (4.56, 25.85)                                                                    | 10 (1.95, 18.06)                                     | 12.46 (-0.42, 25.33)                                           | 15.23 (5.44, 25.01)                                  |
| 12                                                 | 14.81 (3.92, 25.7)                                                                     | 10.01 (1.47, 18.55)                                  | 13.04 (0.03, 26.06)                                            | 14.88 (5.01, 24.76)                                  |

- PM<sub>2.5</sub> in each window was rescaled to two-unit increment.
- N is the analytic sample size for each model.
- Conception date was modeled with 8 degrees of freedom per year (df/year) for 2<sup>nd</sup> trimester PM<sub>2.5</sub> and 4 df/year for PM<sub>2.5</sub> averaged over the whole pregnancy period in the primary analysis.
- The results were obtained from linear regressions with conception date modeled with varied df/year. Models were adjusted for child sex, child age and height at age 4-6 years visit, recruitment site, times splines for visit date and conception date (except for the model without conception date adjustment), maternal race, maternal age at childbirth, maternal education, income adjusted by household size, breastfeeding, maternal Global Severity Index, urinary cotinine adjusted by specific gravity in the 2<sup>nd</sup> trimester, pre-pregnancy BMI class, pregnancy insurance status, child sleep scores, child physical activity levels, child second-hand smoking exposures, child use of medication that potentially increased blood pressure and Child Opportunity Indices.

Abbreviations: SBP: systolic blood pressure, DBP: diastolic blood pressure

**Table S11. Estimated effects of trimester specific PM<sub>2.5</sub> on child BP from the fully adjusted models (Model 3) simultaneously controlled for PM<sub>2.5</sub> in the other two trimesters in the CANDLE cohort**

| Measurements <sup>a</sup>                   | SBP percentile |                               | DBP percentile |                               | HBP            |                           |
|---------------------------------------------|----------------|-------------------------------|----------------|-------------------------------|----------------|---------------------------|
|                                             | N <sup>b</sup> | $\beta$ (95% CI) <sup>c</sup> | N <sup>b</sup> | $\beta$ (95% CI) <sup>c</sup> | N <sup>b</sup> | IRR (95% CI) <sup>c</sup> |
| 1 <sup>st</sup> trimester PM <sub>2.5</sub> | 753            | -2.4 (-12.12, 7.33)           | 753            | 1.43 (-5.75, 8.61)            | 753            | 0.91 (0.51, 1.61)         |
| 2 <sup>nd</sup> trimester PM <sub>2.5</sub> | 753            | 17.16 (6.19, 28.13)           | 753            | 7.55 (-0.33, 15.42)           | 753            | 0.98 (0.52, 1.87)         |
| 3 <sup>rd</sup> trimester PM <sub>2.5</sub> | 753            | -4.47 (-12.24, 3.29)          | 753            | 2.79 (-3.02, 8.61)            | 753            | 1.12 (0.72, 1.74)         |

- PM<sub>2.5</sub> in each window was rescaled to two-unit increment.
- N is the analytic sample size for each model.
- Linear regression models based on complete data were adjusted for child sex, child age and height at age 4-6 years visit, recruitment site, times splines for visit date with 1 degree of freedom per year (df/year), time splines for conception date with 8 df/year, maternal race, maternal age at childbirth, maternal education, income adjusted by household size, breastfeeding, maternal Global Severity Index, urinary cotinine adjusted by specific gravity in the 2<sup>nd</sup> trimester, pre-pregnancy BMI class, pregnancy insurance status, child sleep scores, child physical activity levels, child second-hand smoking exposures, child use of medication that potentially increased blood pressure and Child Opportunity Indices. All three trimester-specific PM<sub>2.5</sub> were included simultaneously in the models.

Abbreviations: SBP: systolic blood pressure, DBP: diastolic blood pressure, HBP: high blood pressure, IRR: incidence rate ratio

**Table S12. Estimated effects of prenatal air pollution exposures on child BP from the fully adjusted models (Model 3) additionally controlled for postnatal exposures in the CANDLE cohort**

| Measurements <sup>a</sup>                                | SBP percentile |                               | DBP percentile |                               | HBP            |                           |
|----------------------------------------------------------|----------------|-------------------------------|----------------|-------------------------------|----------------|---------------------------|
|                                                          | N <sup>b</sup> | $\beta$ (95% CI) <sup>c</sup> | N <sup>b</sup> | $\beta$ (95% CI) <sup>c</sup> | N <sup>b</sup> | IRR (95% CI) <sup>c</sup> |
| 1 <sup>st</sup> trimester PM <sub>2.5</sub>              | 756            | -0.44 (-10.61, 9.72)          | 756            | 2.52 (-5.05, 10.1)            | 756            | 0.68 (0.37, 1.23)         |
| 2 <sup>nd</sup> trimester PM <sub>2.5</sub>              | 756            | 14.77 (3.64, 25.89)           | 756            | 8.28 (-0.04, 16.6)            | 756            | 0.71 (0.36, 1.41)         |
| 3 <sup>rd</sup> trimester PM <sub>2.5</sub>              | 753            | -3.17 (-11.01, 4.67)          | 753            | 3.5 (-2.42, 9.43)             | 753            | 0.99 (0.64, 1.53)         |
| Prenatal PM <sub>2.5</sub>                               | 756            | 6.4 (-6.21, 19)               | 756            | 11.06 (1.02, 21.11)           | 756            | 1.16 (0.52, 2.57)         |
| Prenatal NO <sub>2</sub>                                 | 756            | 1.64 (-1.39, 4.67)            | 756            | 0.03 (-2.44, 2.5)             | 756            | 0.91 (0.75, 1.11)         |
| Prenatal proximity to major roadway (<150m) <sup>d</sup> | 757            | 0.43 (-4.23, 5.09)            | 757            | 1.01 (-2.59, 4.6)             | 757            | 1.06 (0.81, 1.39)         |

- PM<sub>2.5</sub> and NO<sub>2</sub> in each window were rescaled to two-unit increment.
- N is the analytic sample size for each model.
- Linear regressions were used for BP percentiles and Poisson regressions were used for HBP based on complete data. Models were adjusted for prenatal exposures, child sex, child age and height at age 4-6 years visit, recruitment site, maternal race, maternal age at childbirth, maternal education, income adjusted by household size, breastfeeding, maternal Global Severity Index, urinary cotinine adjusted by specific gravity in the 2<sup>nd</sup> trimester, pre-pregnancy BMI class, pregnancy insurance status, child sleep scores, child physical activity levels, child second-hand smoking exposures, child use of medication that potentially increased blood pressure and Child Opportunity Indices. For PM<sub>2.5</sub> and NO<sub>2</sub>, time splines for visit date with 1 degree of freedom per year (1df/year) were universally adjusted. In addition, time splines for conception date with 8 df/year were controlled for trimester specific PM<sub>2.5</sub>, and 4 df/year were used for PM<sub>2.5</sub> and NO<sub>2</sub> over the prenatal period. There was no time adjustment for proximity to major roadway in all models.
- Proximity to major roadway was estimated based on the single address with the longest residential history in the prenatal window and was dichotomized at 150 meters from any major roadway of A1, A2 or A3.

Abbreviations: SBP: systolic blood pressure, DBP: diastolic blood pressure, HBP: high blood pressure, IRR: incidence rate ratio

**Table S13. Estimated effects of PM<sub>2.5</sub> in the 2<sup>nd</sup> trimester and during prenatal period on BP percentiles and raw BP from the full model (Model 3) adjusted for thin-plate regression splines (TPRS) of child height and age with varied degree of freedom in the CANDLE cohort**

| <b>2<sup>nd</sup> trimester PM<sub>2.5</sub> (N = 756)<sup>a</sup></b> |                                                                   |                                                                   |                                                            |                                                            |
|------------------------------------------------------------------------|-------------------------------------------------------------------|-------------------------------------------------------------------|------------------------------------------------------------|------------------------------------------------------------|
| <b>degree of freedom for TPRS</b>                                      | <b>SBP percentile<br/><math>\beta</math> (95% CI)<sup>b</sup></b> | <b>DBP percentile<br/><math>\beta</math> (95% CI)<sup>b</sup></b> | <b>Raw SBP<br/><math>\beta</math> (95% CI)<sup>b</sup></b> | <b>Raw DBP<br/><math>\beta</math> (95% CI)<sup>b</sup></b> |
| 5                                                                      | 14.07 (4.25, 23.89)                                               | 7.86 (0.5, 15.21)                                                 | 5.22 (1.4, 9.04)                                           | 3.51 (-0.11, 7.13)                                         |
| 6                                                                      | 14.01 (4.18, 23.83)                                               | 7.83 (0.46, 15.19)                                                | 5.22 (1.4, 9.04)                                           | 3.54 (-0.08, 7.16)                                         |
| 7                                                                      | 14.01 (4.17, 23.84)                                               | 7.83 (0.46, 15.2)                                                 | 5.22 (1.4, 9.05)                                           | 3.54 (-0.08, 7.16)                                         |
| 8                                                                      | 14.06 (4.23, 23.89)                                               | 7.85 (0.48, 15.23)                                                | 5.24 (1.41, 9.06)                                          | 3.54 (-0.09, 7.16)                                         |
| 9                                                                      | 14.06 (4.22, 23.9)                                                | 7.85 (0.48, 15.23)                                                | 5.24 (1.41, 9.06)                                          | 3.54 (-0.09, 7.16)                                         |
| 10                                                                     | 14.3 (4.43, 24.17)                                                | 7.82 (0.42, 15.21)                                                | 5.25 (1.42, 9.09)                                          | 3.5 (-0.14, 7.14)                                          |
| 11                                                                     | 14.68 (4.82, 24.53)                                               | 7.86 (0.46, 15.27)                                                | 5.41 (1.58, 9.25)                                          | 3.57 (-0.07, 7.21)                                         |
| 12                                                                     | 14.68 (4.82, 24.54)                                               | 7.9 (0.49, 15.31)                                                 | 5.44 (1.6, 9.27)                                           | 3.61 (-0.03, 7.25)                                         |
| <b>Prenatal PM<sub>2.5</sub> (N = 756)<sup>a</sup></b>                 |                                                                   |                                                                   |                                                            |                                                            |
| <b>degree of freedom for TPRS</b>                                      | <b>SBP percentile<br/><math>\beta</math> (95% CI)<sup>b</sup></b> | <b>DBP percentile<br/><math>\beta</math> (95% CI)<sup>b</sup></b> | <b>Raw SBP<br/><math>\beta</math> (95% CI)<sup>b</sup></b> | <b>Raw DBP<br/><math>\beta</math> (95% CI)<sup>b</sup></b> |
| 5                                                                      | 7.71 (-3.6, 19.02)                                                | 10.22 (1.86, 18.59)                                               | 2.55 (-1.85, 6.95)                                         | 3.96 (-0.16, 8.07)                                         |
| 6                                                                      | 7.68 (-3.63, 18.99)                                               | 10.22 (1.85, 18.6)                                                | 2.55 (-1.85, 6.95)                                         | 3.97 (-0.14, 8.08)                                         |
| 7                                                                      | 7.78 (-3.56, 19.11)                                               | 10.2 (1.81, 18.59)                                                | 2.7 (-1.71, 7.1)                                           | 4.09 (-0.03, 8.21)                                         |
| 8                                                                      | 7.77 (-3.56, 19.1)                                                | 10.19 (1.8, 18.59)                                                | 2.69 (-1.71, 7.1)                                          | 4.09 (-0.04, 8.21)                                         |
| 9                                                                      | 7.77 (-3.57, 19.11)                                               | 10.19 (1.8, 18.58)                                                | 2.7 (-1.71, 7.1)                                           | 4.09 (-0.04, 8.21)                                         |
| 10                                                                     | 7.96 (-3.42, 19.33)                                               | 10.18 (1.76, 18.6)                                                | 2.7 (-1.72, 7.12)                                          | 4.06 (-0.08, 8.2)                                          |
| 11                                                                     | 8.83 (-2.57, 20.23)                                               | 10.33 (1.88, 18.79)                                               | 3.09 (-1.34, 7.52)                                         | 4.25 (0.1, 8.41)                                           |
| 12                                                                     | 8.83 (-2.58, 20.23)                                               | 10.36 (1.9, 18.82)                                                | 3.11 (-1.32, 7.54)                                         | 4.28 (0.13, 8.43)                                          |

- PM<sub>2.5</sub> in each window were rescaled to two-unit increment.
- Linear regression models based on complete data were adjusted for child sex, thin-plate regression splines for child age and height at age 4-6 years visit with varied degrees of freedom from 5-12, recruitment site, maternal race, maternal age at childbirth, maternal education, income adjusted by household size, breastfeeding, maternal Global Severity Index, urinary cotinine adjusted by specific gravity in the 2<sup>nd</sup> trimester, pre-pregnancy BMI class, pregnancy insurance status, child sleep scores, child physical activity levels, child second-hand smoking exposures, child use of medication that potentially increased blood pressure and Child Opportunity Indices. Time splines for visit date with 1 degree of freedom per year (df/year) was adjusted in all models. Time splines for conception date with 8 df/year and 4 df/year were included in the models with 2<sup>nd</sup> trimester PM<sub>2.5</sub> and prenatal PM<sub>2.5</sub>, respectively.

Abbreviations: SBP: systolic blood pressure, DBP: diastolic blood pressure, TPRS: thin-plate regression splines

**Table S14. Estimated effects of air pollution exposures on BP percentiles and HBP from the fully adjusted model with linear restricted cubic splines of all continuous variables in the CANDLE cohort**

| Measurements <sup>a</sup>                       | SBP percentile |                               | DBP percentile |                               | HBP            |                           |
|-------------------------------------------------|----------------|-------------------------------|----------------|-------------------------------|----------------|---------------------------|
|                                                 | N <sup>b</sup> | $\beta$ (95% CI) <sup>c</sup> | N <sup>b</sup> | $\beta$ (95% CI) <sup>c</sup> | N <sup>b</sup> | IRR (95% CI) <sup>c</sup> |
| <b>Prenatal exposures</b>                       |                |                               |                |                               |                |                           |
| 1 <sup>st</sup> trimester PM <sub>2.5</sub>     | 756            | 2.05 (-7.39, 11.49)           | 756            | 4.27 (-2.53, 11.06)           | 756            | 0.93 (0.53, 1.66)         |
| 2 <sup>nd</sup> trimester PM <sub>2.5</sub>     | 756            | 14.42 (4.45, 24.39)           | 756            | 8.41 (1.23, 15.59)            | 756            | 0.93 (0.5, 1.73)          |
| 3 <sup>rd</sup> trimester PM <sub>2.5</sub>     | 753            | -1.98 (-9.59, 5.64)           | 753            | 4.14 (-1.66, 9.95)            | 753            | 1.04 (0.68, 1.59)         |
| Prenatal PM <sub>2.5</sub>                      | 756            | 8.5 (-2.8, 19.81)             | 756            | 12 (3.45, 20.54)              | 756            | 1.59 (0.76, 3.31)         |
| Prenatal NO <sub>2</sub>                        | 756            | 1.22 (-0.83, 3.27)            | 756            | 0.46 (-1.06, 1.97)            | 756            | 1.03 (0.9, 1.17)          |
| Proximity to major roadway (<150m) <sup>d</sup> | 757            | 0.38 (-3.82, 4.59)            | 757            | 0.03 (-3.09, 3.15)            | 757            | 1.03 (0.81, 1.31)         |
| <b>Postnatal exposures</b>                      |                |                               |                |                               |                |                           |
| Postnatal PM <sub>2.5</sub>                     | 715            | 8.46 (-9.7, 26.62)            | 715            | 9.12 (-3.68, 21.92)           | 715            | 1.84 (0.65, 5.2)          |
| Postnatal NO <sub>2</sub>                       | 715            | 0.17 (-2.68, 3.02)            | 715            | 1.01 (-1.11, 3.13)            | 715            | 1.14 (0.95, 1.36)         |
| Proximity to major roadway (<150m) <sup>d</sup> | 719            | 0.06 (-4.33, 4.46)            | 719            | -1.28 (-4.61, 2.06)           | 719            | 0.96 (0.74, 1.25)         |

a. PM<sub>2.5</sub> and NO<sub>2</sub> in each window were rescaled to two-unit increment.

b. N is the analytic sample size for each model.

c. Multivariate linear regressions were used for BP percentiles and Poisson regressions were used for HBP based on complete data. Models were adjusted for adjusted for child sex, child age and height at age 4-6 years visit, recruitment site, times splines for visit date and date of conception, maternal race, maternal age at childbirth, maternal education, income adjusted by household size, breastfeeding, maternal Global Severity Index, urinary cotinine adjusted by specific gravity in the 2<sup>nd</sup> trimester, BMI class before pregnancy, insurance status, child sleep scores, child physical activity levels, child second-hand smoking exposures, child use of medication that potentially increased blood pressure and Child Opportunity Indices. Visit date was universally modeled with 1 degree of freedom (df)/year in all models. Conception date was modeled with 1 df/year for analyses with NO<sub>2</sub>, and was modeled with varied df for PM<sub>2.5</sub> in different windows: 8 df/year of conception date for trimester specific PM<sub>2.5</sub>, 4 df/year for prenatal PM<sub>2.5</sub> and 1 df/year for postnatal PM<sub>2.5</sub>. There was no time adjustment for proximity to major roadway in all models. All continuous variables, including child age and height at age 4-6 years visit, maternal age at childbirth, income adjusted by household size, maternal Global Severity Index, urinary cotinine adjusted by specific gravity in the 2<sup>nd</sup> trimester, child sleep scores and Child Opportunity Indices, were modeled as linear restricted cubic splines.

d. Proximity to major roadway was estimated based on the single address with the longest residential history in the pre- and postnatal window and was dichotomized at 150 meters from any major roadway of A1, A2 or A3.

Abbreviations: SBP: systolic blood pressure, DBP: diastolic blood pressure, HBP: high blood pressure, IRR: incidence rate ratio



**Table S15. Estimated effects of air pollution exposures on log transformed DBP percentile from the fully adjusted model in the CANDLE cohort**

| Measurements <sup>a</sup>                       | N <sup>b</sup> | $\beta$ (95%CI) <sup>c</sup> |
|-------------------------------------------------|----------------|------------------------------|
| <b>Prenatal period</b>                          |                |                              |
| 1 <sup>st</sup> trimester PM <sub>2.5</sub>     | 756            | 0.07 (-0.04, 0.18))          |
| 2 <sup>nd</sup> trimester PM <sub>2.5</sub>     | 756            | 0.14 (0.02, 0.25))           |
| 3 <sup>rd</sup> trimester PM <sub>2.5</sub>     | 753            | 0.06 (-0.04, 0.16))          |
| Prenatal PM <sub>2.5</sub>                      | 756            | 0.18 (0.03, 0.33))           |
| Prenatal NO <sub>2</sub>                        | 756            | 0.002 (-0.02, 0.03)          |
| Proximity to major roadway (<150m) <sup>d</sup> | 757            | -0.01 (-0.07, 0.04)          |
| <b>Postnatal period</b>                         |                |                              |
| Postnatal PM <sub>2.5</sub>                     | 715            | 0.11 (-0.1, 0.33))           |
| Postnatal NO <sub>2</sub>                       | 715            | 0.01 (-0.03, 0.04)           |
| Proximity to major roadway (<150m) <sup>d</sup> | 719            | -0.02 (-0.08, 0.03)          |

- PM<sub>2.5</sub> and NO<sub>2</sub> in each window were rescaled to two-unit increment.
- N is the analytic sample size for each model.
- The dependent variable is the log transformed DBP percentile. Linear regression models based on complete data were adjusted for child sex, child age and height at age 4-6 years visit, recruitment site, times splines for visit date and conception date for PM<sub>2.5</sub> and NO<sub>2</sub>, maternal race, maternal age at childbirth, maternal education, income adjusted by household size, breastfeeding, maternal Global Severity Index, urinary cotinine adjusted by specific gravity in the 2<sup>nd</sup> trimester, pre-pregnancy BMI class, pregnancy insurance status, child sleep scores, child physical activity levels, child second-hand smoking exposures, child use of medication that potentially increased blood pressure and Child Opportunity Indices. Time splines for visit date with 1 degree of freedom per year (df/year) was adjusted in all models. Conception date was modeled with 1 df/year for analyses with NO<sub>2</sub>, and was modeled with varied df for PM<sub>2.5</sub> in different windows: 8 df/year of conception date for trimester specific PM<sub>2.5</sub>, 4 df/year for prenatal PM<sub>2.5</sub> and 1 df/year for postnatal PM<sub>2.5</sub>. There was no time adjustment for proximity to major roadway.
- Proximity to major roadway was estimated based on the single address with the longest residential history in the pre- and postnatal window and was dichotomized at 150 meters from any major roadway of A1, A2 or A3.

**Figure S1: Directed acyclic graphs for the associations of pre- (A) and postnatal natal air pollution exposures (B) with child blood pressure (Textor et al. 2016)**

**A. Prenatal air pollution exposures and child blood pressure**

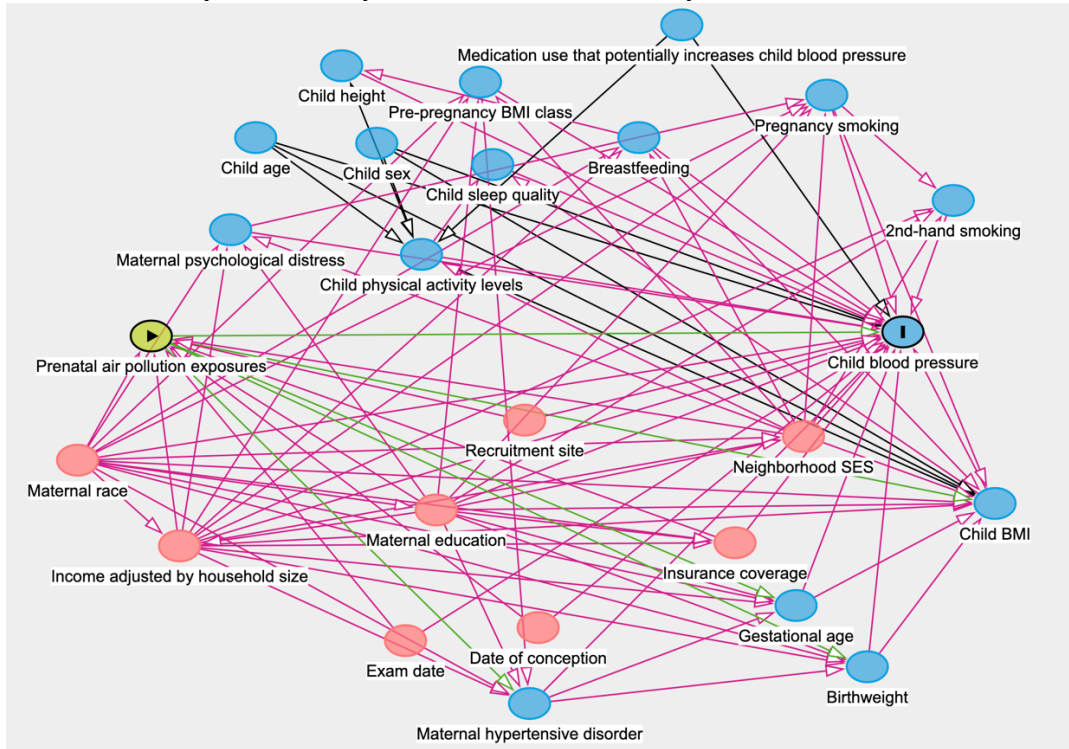

**B. Postnatal air pollution exposures and child blood pressure**

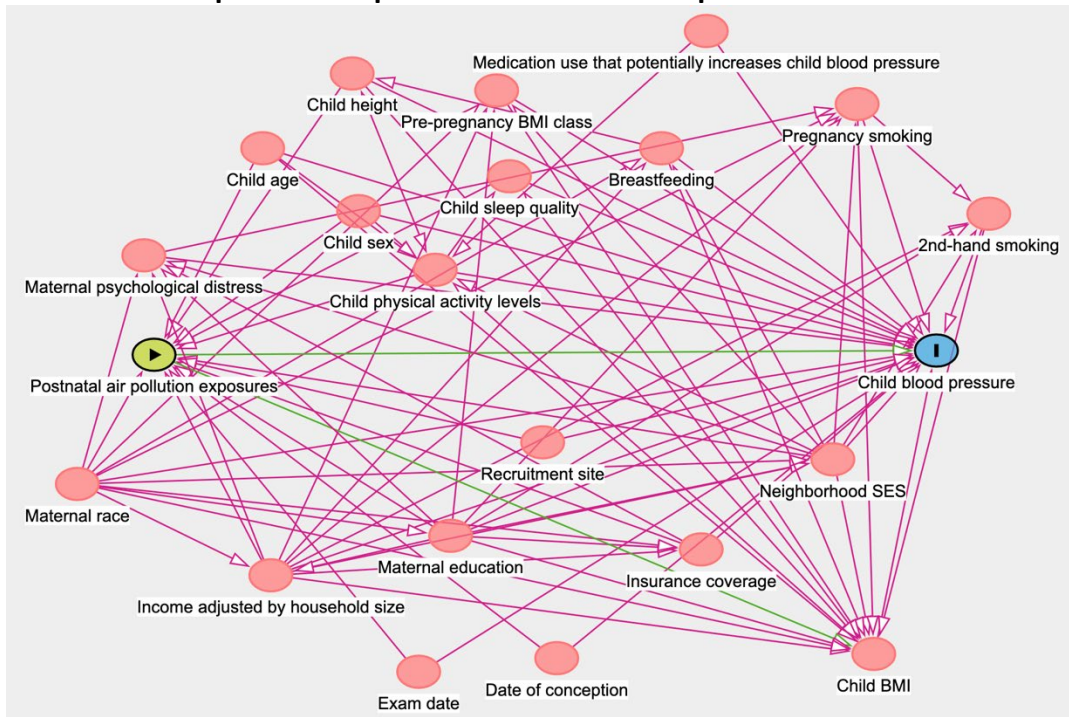

**Figure captions:**

Shown are the directed acyclic graphs for the associations of pre- and postnatal natal air pollution exposures with child blood pressure.

**Reference:**

Textor J, van der Zander B, Gilthorpe MS, Liskiewicz M, Ellison GT. 2016. Robust causal inference using directed acyclic graphs: the R package “dagitty.” *Int J Epidemiol* 45:1887–1894; doi:10.1093/ije/dyw341.

**Figure S2: Scatterplots of air pollution exposures in each window by splines of conception date**

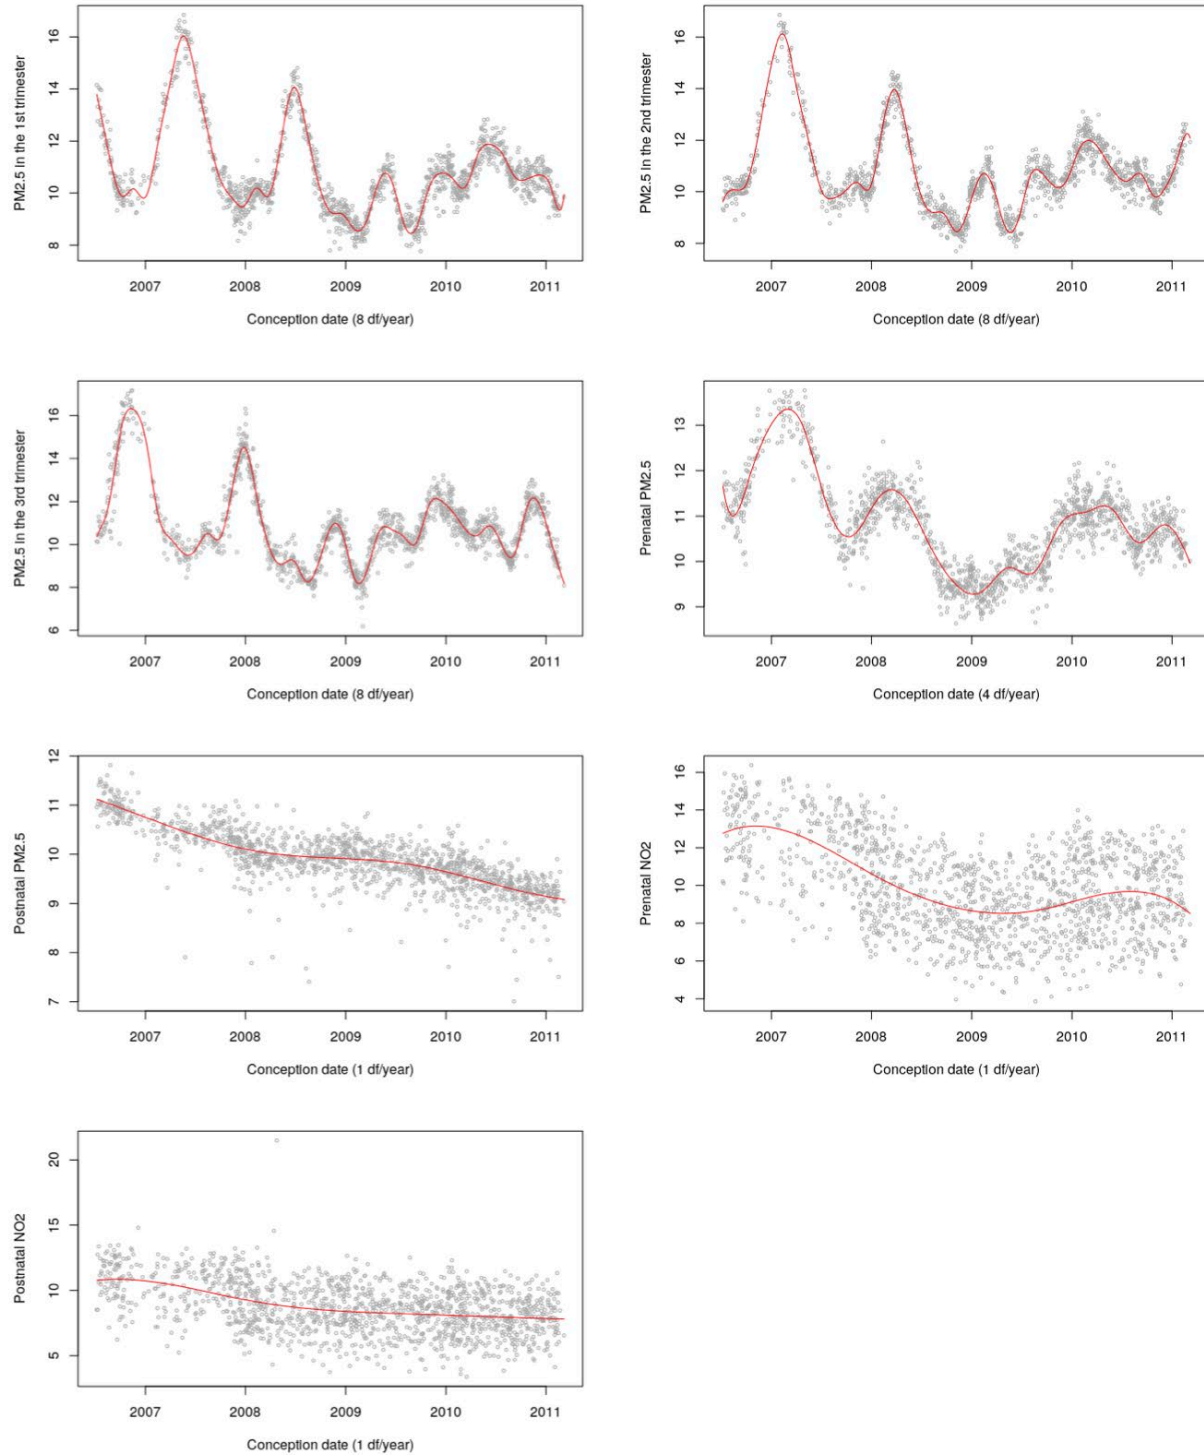

**Figure captions:**

Shown are scatterplots of PM<sub>2.5</sub> and NO<sub>2</sub> in each window by splines of conception date with varied degree(s) of freedom per year. The red line indicates the fitted curve between the observed values and the predicted values.

**Figure S3. Distributions of systolic and diastolic blood pressure percentiles and raw measurements in the CANDEL cohort**

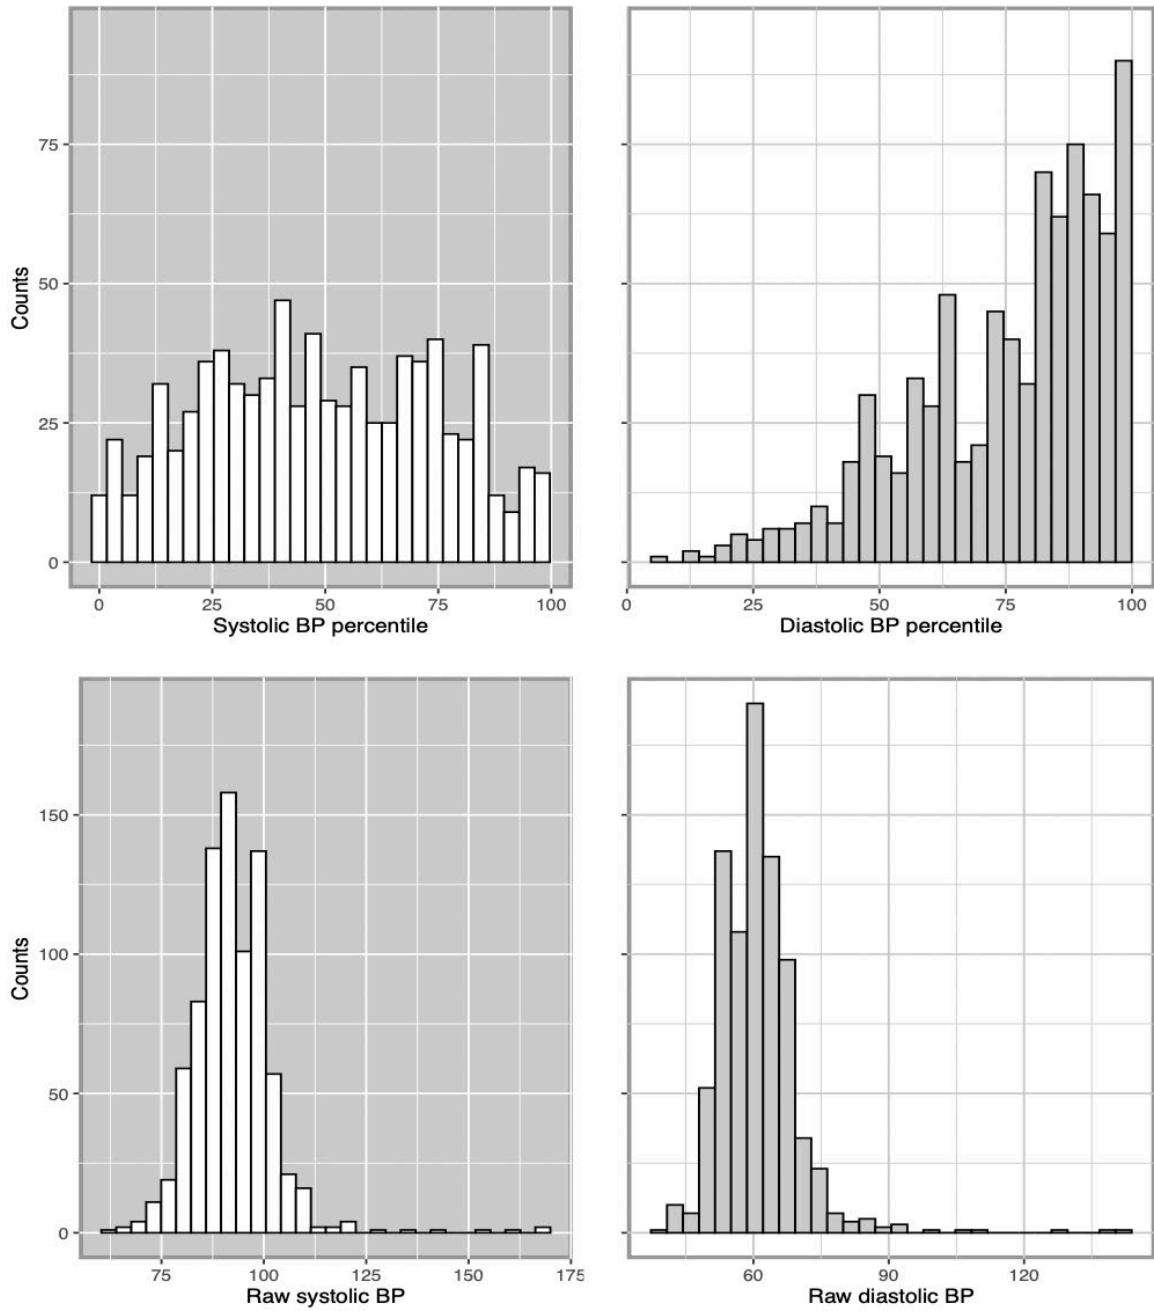

**Figure captions:**

Shown are histograms of systolic and diastolic blood pressure percentiles and raw measurements in the CANDEL cohort.

**Figure S4. Boxplots of air pollution exposures in different windows in the CANDEL cohort**

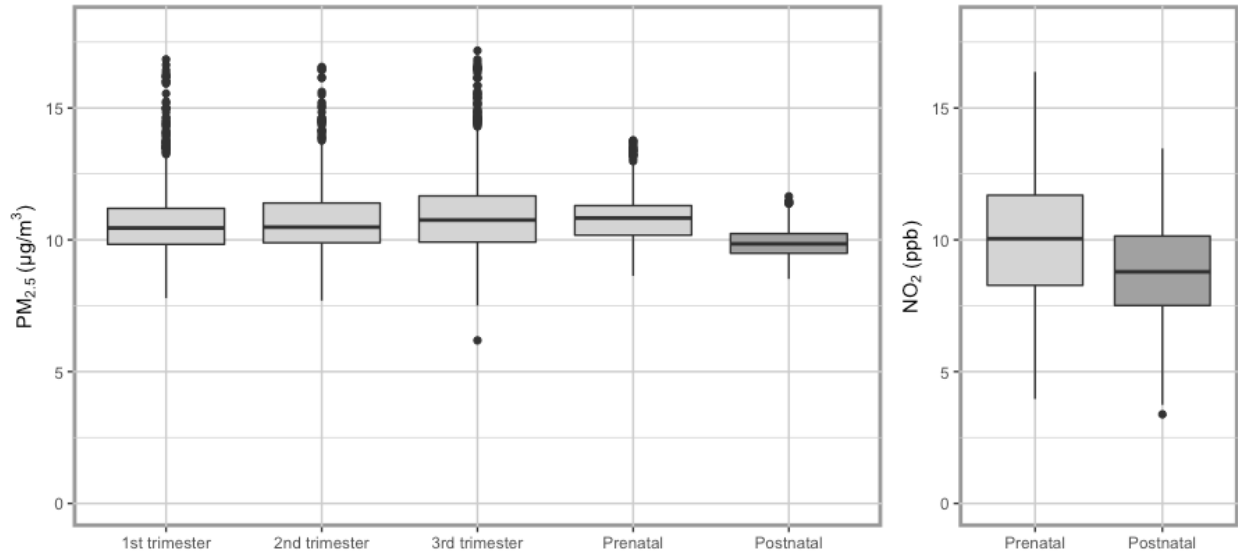

**Figure captions:**

Shown are boxplots of PM<sub>2.5</sub> and NO<sub>2</sub> in each pre- and postnatal window in the CANDLER cohort. The upper and lower boundaries of the boxes indicate the 75<sup>th</sup> and 25<sup>th</sup> percentiles, respectively. The horizontal lines inside the boxes show the medians. The vertical lines below the boxes show the 25<sup>th</sup> percentile – 1.5×interquartile range, and the vertical lines above the boxes show the 75<sup>th</sup> percentile + 1.5×interquartile range. The black dots indicate potential outliers.

Figure S5. Estimated effects of PM<sub>2.5</sub> in the 2<sup>nd</sup> trimester and during prenatal period on BP percentiles from the full model (Model 3) adjusted for time splines of date of conception with varied degree of freedom in the CANDEL cohort

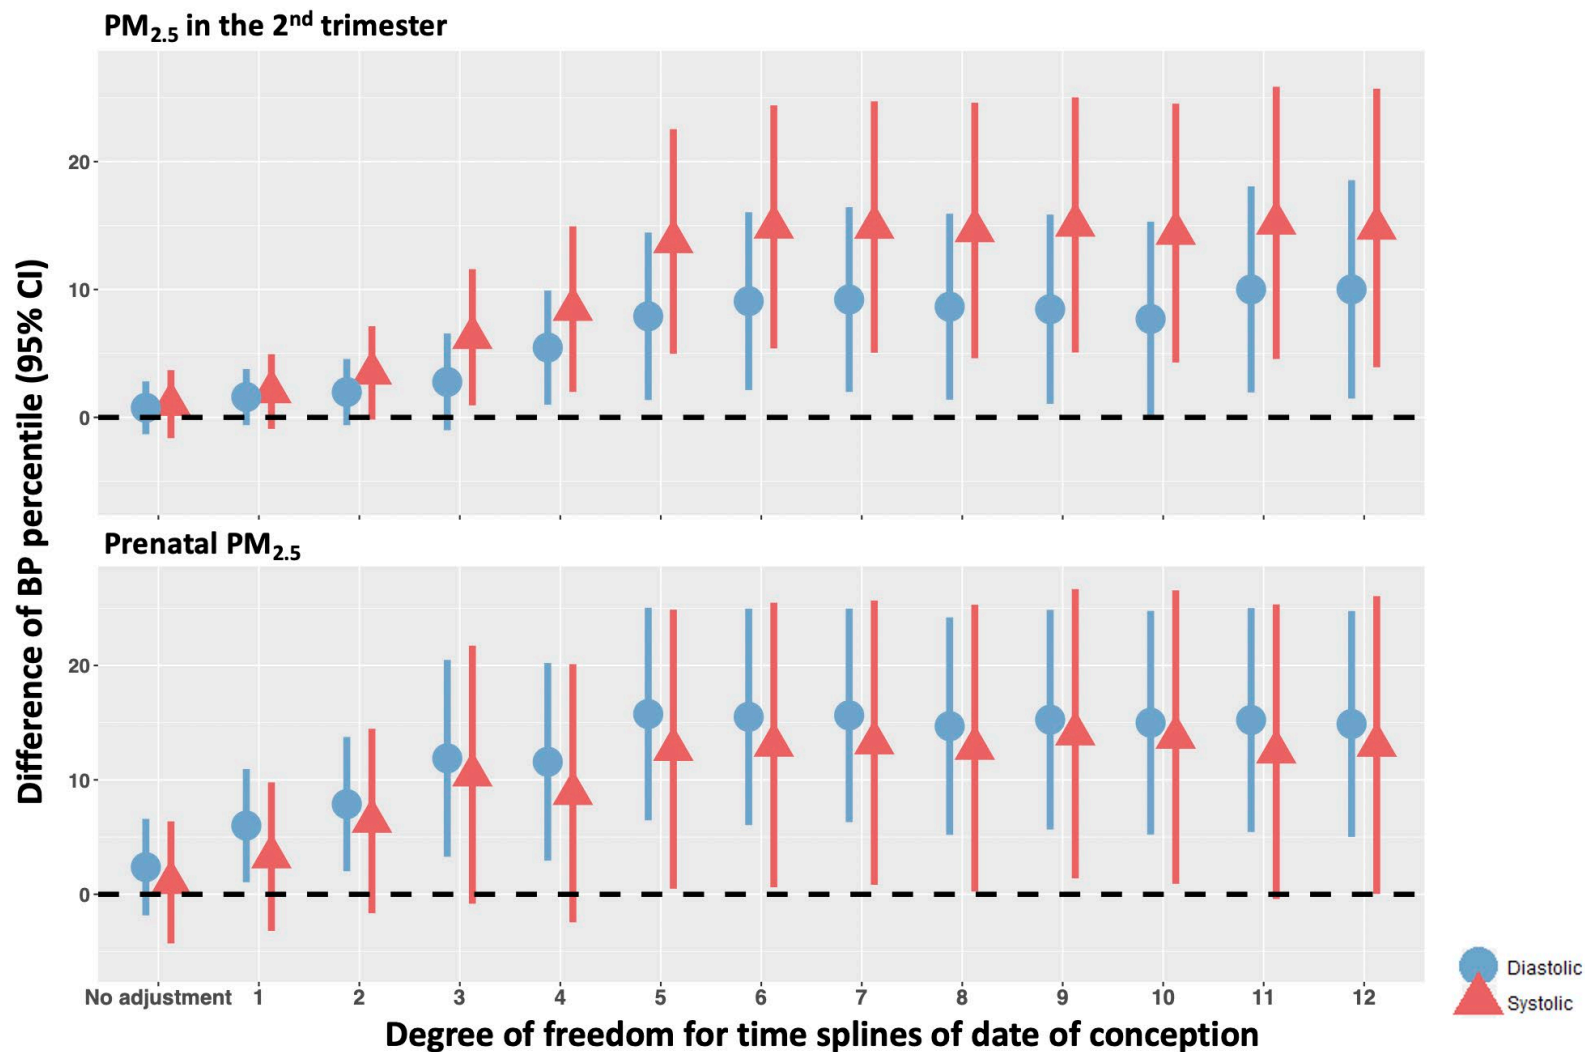

**Figure captions:**

Shown are estimated effects of PM<sub>2.5</sub> in the 2<sup>nd</sup> trimester and during prenatal period on BP percentiles from the full model (Model 3) adjusted for time splines of date of conception with varied degree of freedom in the CANDEL cohort. Conception date was modeled with 8 degrees of freedom per year (df/year) for 2<sup>nd</sup> trimester PM<sub>2.5</sub> and 4 df/year for PM<sub>2.5</sub> averaged over the whole pregnancy period in the primary analysis. Linear regressions was adjusted for child sex, child age and height at age 4-6 years visit, recruitment site, times splines for visit date (1 df/year) and date of conception (except for the model without conception date adjustment), maternal race, maternal age at childbirth, maternal education, income adjusted by household size, breastfeeding, maternal Global Severity Index, urinary cotinine adjusted by specific gravity in the 2<sup>nd</sup> trimester, BMI class before pregnancy, insurance status, child sleep scores, child physical activity levels, child second-hand smoking exposures, child use of medication that potentially increased blood pressure and Child Opportunity Indices. The degree of freedom for date of conception varied from zero (no adjustment) to twelve. The symbols of triangles and circles indicate the effect estimate, the error bars show 95% confidence intervals, and the dot lines show the null value of zero. Please refer to Table S10 for numeric data for this analysis.



Figure 6S: Estimated effects of PM<sub>2.5</sub> in the 2<sup>nd</sup> trimester and during prenatal period on BP percentiles and raw BP from the full model (Model 3) adjusted for thin-plate regression splines (TPRS) of child height and age with varied degree of freedom in the CANDEL cohort

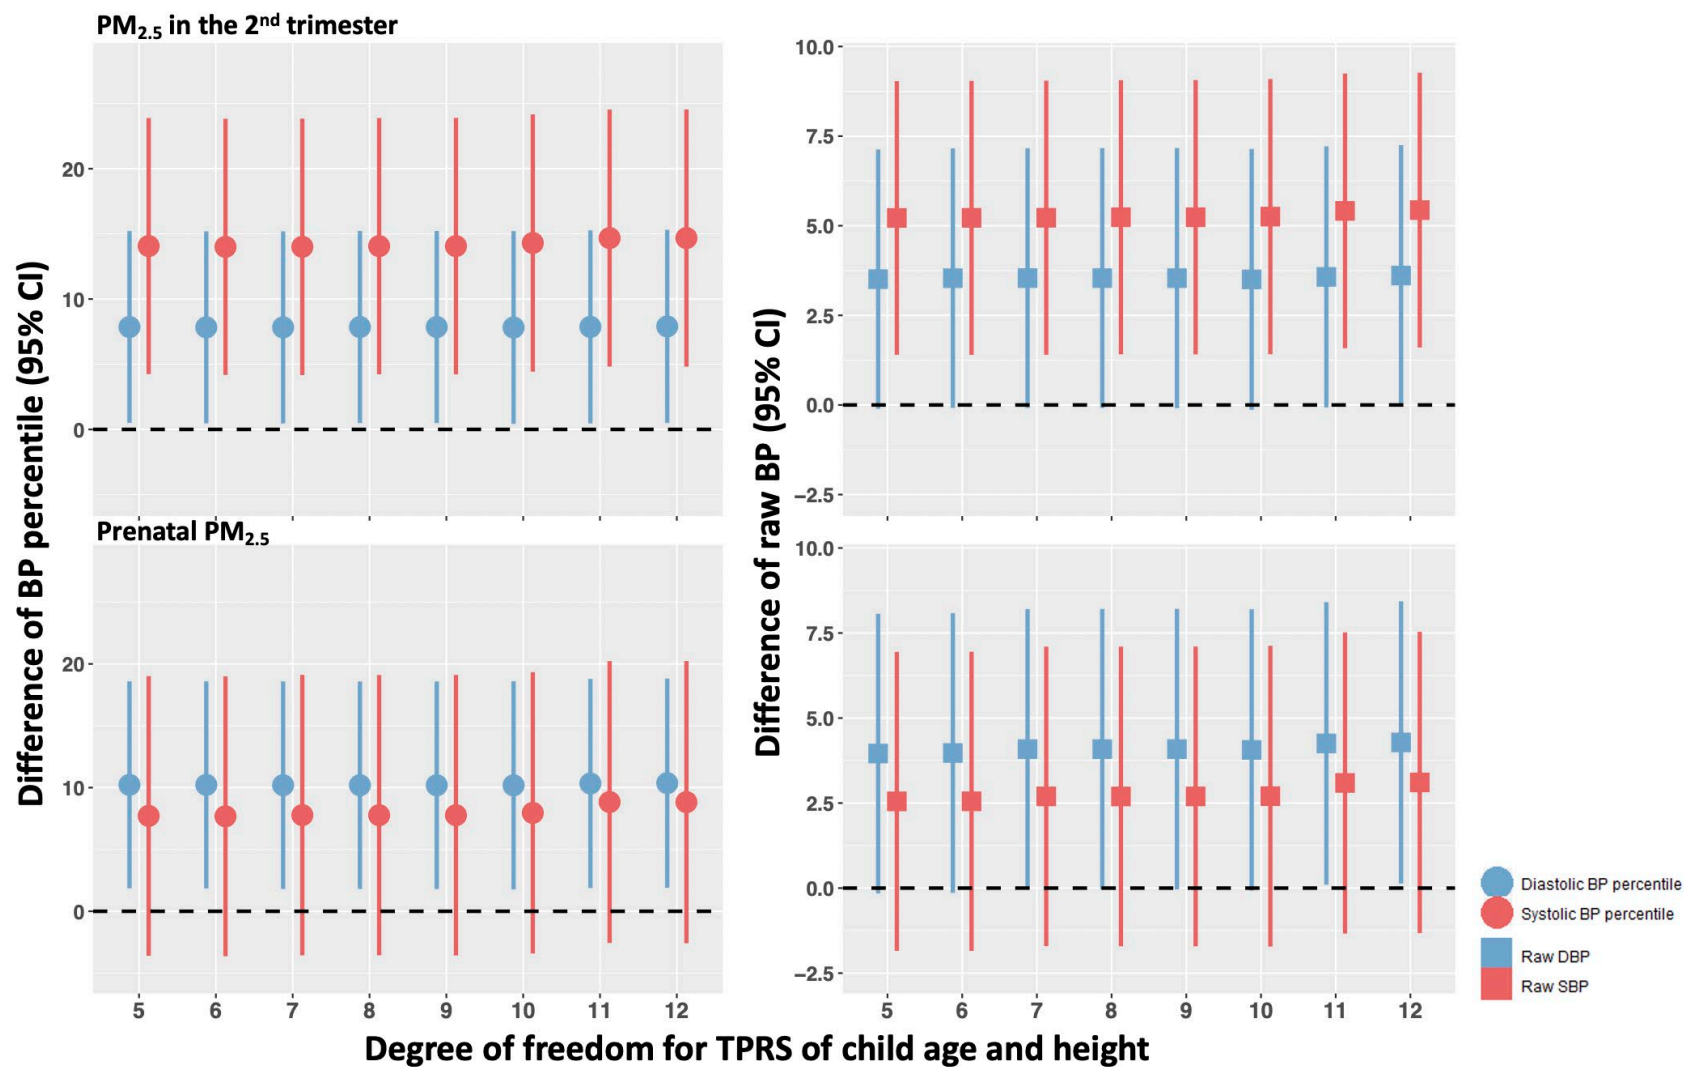

**Figure captions:**

Figure 7S: Shown are estimated effects of PM<sub>2.5</sub> in the 2<sup>nd</sup> trimester and during prenatal period on BP percentiles and raw BP from the full model (Model 3) adjusted for thin-plate regression splines (TPRS) of child height and age with varied degree of freedom in the CANDEL cohort. Model 3 was adjusted for adjusted for child sex, child age and height at age 4-6 years visit, recruitment site, times splines for visit date and date of conception, maternal race, maternal age at childbirth, maternal education, income adjusted by household size, breastfeeding, maternal Global Severity Index, urinary cotinine adjusted by specific gravity in the 2<sup>nd</sup> trimester, BMI class before pregnancy, insurance status, child sleep scores, child physical activity levels, child second-hand smoking exposures, child use of medication that potentially increased blood pressure and Child Opportunity Indices. The degree of freedom for TPRS varied from five to twelve. The symbols of squares and circles indicate the effect estimate, the error bars show 95% confidence intervals, and the dot lines show the null value of zero. Please refer to Table S13 for numeric data for this analysis.
