# Supplementary material
Source: PubMed Central journal article supplement (PMC8043131)
Supplement: ehp7486.smcontents.508.pdf [file ehp7486.smcontents.508.pdf]

**Note to readers with disabilities:** *EHP* strives to ensure that all journal content is accessible to all readers. However, some figures and Supplemental Material published in *EHP* articles may not conform to [508 standards](#) due to the complexity of the information being presented. If you need assistance accessing journal content, please contact [ehp508@niehs.nih.gov](mailto:ehp508@niehs.nih.gov). Our staff will work with you to assess and meet your accessibility needs within 3 working days.

### **Supplemental Material**

#### **Associations of Pre- and Postnatal Air Pollution Exposures with Child Blood Pressure and Modification by Maternal Nutrition: A Prospective Study in the CANDLE Cohort**

Yu Ni, Adam A. Szpiro, Michael T. Young, Christine T. Loftus, Nicole R. Bush, Kaja Z. LeWinn, Sheela Sathyanarayana, Daniel A. Enquobahrie, Robert L. Davis, Mario Kratz, Annette L. Fitzpatrick, Jennifer T. Sonney, Frances A. Tylavsky, and Catherine J. Karr

#### **Table of Contents**

**Table S1.** Distributions of nutritional measurements by categories in the CANDLE cohort.

**Table S2.** Comparisons of baseline characteristics between the analytic sample and the full CANDLE cohort at enrollment.

**Table S3.** Distributions of blood pressure raw measurements and percentiles in the CANDLE children.

**Table S4.** Spearman correlations of air pollution exposures in different windows in the CANDLE cohort.

**Table S5.** Distributions of air pollution exposures in different windows by maternal HEI levels (Median and above vs. Below Median), maternal plasma folate (1<sup>st</sup> quartile vs. > 1<sup>st</sup> quartile), child sex (female vs. male) and maternal race (Black vs. non-Black) in the CANDLE cohort.

**Table S6.** Estimated effects of air pollution exposures on BP percentiles by maternal HEI levels (Median and above vs. Below Median), maternal plasma folate (1<sup>st</sup> quartile vs. > 1<sup>st</sup> quartile), child sex (female vs. male) and maternal race (Black vs. non-Black) from the interaction models in the CANDLE cohort.

**Table S7.** Estimated effects of air pollution exposures on HBP by maternal HEI levels (Median and above vs. Below Median), maternal plasma folate (1<sup>st</sup> quartile vs. > 1<sup>st</sup> quartile), child sex (female vs. male) and maternal race (Black vs. non-Black) from the interaction models in the CANDLE cohort.

**Table S8.** Comparisons of estimates and 95% CI for PM<sub>2.5</sub> from multi-year spatio-temporal models and fixed-year spatio-temporal models in the CANDLE cohort.

**Table S9.** Comparisons of estimates and 95% CI for NO<sub>2</sub> from annual national models and fixed year national models in the CANDLE cohort.

**Table S10.** Estimated effects of PM<sub>2.5</sub> in the 2<sup>nd</sup> trimester and during the whole prenatal period on BP percentiles from the full model (Model 3) adjusted for time splines of date of conception with varied degree of freedom in the CANDLE cohort.

**Table S11.** Estimated effects of trimester specific PM<sub>2.5</sub> on child BP from the fully adjusted models (Model 3) simultaneously controlled for PM<sub>2.5</sub> in the other two trimesters in the CANDLE cohort.

**Table S12.** Estimated effects of prenatal air pollution exposures on child BP from the fully adjusted models (Model 3) additionally controlled for postnatal exposures in the CANDLE cohort.

**Table S13.** Estimated effects of PM<sub>2.5</sub> in the 2<sup>nd</sup> trimester and during prenatal period on BP percentiles and raw BP from the full model (Model 3) adjusted for thin-plate regression splines (TPRS) of child height and age with varied degree of freedom in the CANDLE cohort.

**Table S14.** Estimated effects of air pollution exposures on BP percentiles and HBP from the fully adjusted model with linear restricted cubic splines of all continuous variables in the CANDLE cohort.

**Table S15.** Estimated effects of air pollution exposures on log transformed DBP percentile from the fully adjusted model in the CANDLE cohort.

**Figure S1.** Directed acyclic graphs for the associations of pre- (A) and postnatal natal air pollution exposures (B) with child blood pressure (Textor et al. 2016).

**Figure S2.** Scatterplots of air pollution exposures in each window by splines of conception date.

**Figure S3.** Distributions of systolic and diastolic blood pressure percentiles and raw measurements in the CANDEL cohort.

**Figure S4.** Boxplots of air pollution exposures in different windows in the CANDEL cohort.

**Figure S5.** Estimated effects of PM<sub>2.5</sub> in the 2<sup>nd</sup> trimester and during prenatal period on BP percentiles from the full model (Model 3) adjusted for time splines of date of conception with varied degree of freedom in the CANDEL cohort.

**Figure S6.** Estimated effects of PM<sub>2.5</sub> in the 2<sup>nd</sup> trimester and during prenatal period on BP percentiles and raw BP from the full model (Model 3) adjusted for thin-plate regression splines (TPRS) of child height and age with varied degree of freedom in the CANDEL cohort.

## Reference
